# Supplementary material for: Selectfluor-mediated construction of 3-arylselenenyl and 3,4-bisarylselenenyl spiro[4.5]trienones via cascade annulation of N-phenylpropiolamides with diselenides
Source: Royal Society of Chemistry journal article supplement (doi:10.1039/d2nj00869f), 2022-01-01
Supplement: d2nj00869f1.pdf [file d2nj00869f1.pdf]

# Supporting Information

## Selectfluor-Mediated Construction of 3-Arylselenenyl and 3,4-Bisarylselenenyl Spiro[4.5]trienones *via* Cascade Annulation of *N*-Phenylpropiolamides with Diselenides

Jinwei Yuan,<sup>a,\*</sup> Qian Chen,<sup>a</sup> Wentao Wu,<sup>a</sup> Jianjun Zhao,<sup>a</sup> Liangru Yang,<sup>a</sup> Yongmei Xiao,<sup>a</sup> Pu Mao<sup>a</sup>,  
Lingbo Qu<sup>b</sup>

<sup>a</sup> School of Chemistry & Chemical Engineering, Henan University of Technology, Zhengzhou 450001, P. R. China

<sup>b</sup> College of Chemistry, Zhengzhou University, Zhengzhou 450001, P. R. China

**\*Corresponding authors:**

**E-mail:** [yuanjinweigs@126.com](mailto:yuanjinweigs@126.com) (Jinwei Yuan)

---

### Contents

|   |                                         |    |
|---|-----------------------------------------|----|
| 1 | General information .....               | S1 |
| 2 | Screening the reaction conditions ..... | S1 |
| 3 | Copies of spectra of products.....      | S2 |

## 1 General information

All chemicals were commercially available and used as received without further. Column chromatography was performed using 300-400 mesh silica. Nuclear magnetic resonance spectra were recorded on Bruker Avance 400 MHz spectrometer.  $^1\text{H}$  NMR spectra are recorded in parts per million from tetramethylsilane. Data were reported as follows: chemical shift, multiplicity (s = singlet, d = doublet, t = triplet, m = multiplet and br = broad), coupling constant in Hz and integration.  $^{13}\text{C}$  NMR spectra were recorded in parts per million from tetramethylsilane.  $^{19}\text{F}$  NMR spectra were recorded in parts per million with fluorobenzene as external standard. High resolution mass spectra (HR MS) were obtained on Thermo Scientific LTQ Orbitrap XL instrument using the ESI technique. IR spectra were recorded on WQF-510 Fourier transform infrared spectrophotometer. Melting points were measured on an XT4A microscopic apparatus uncorrected.

## 2 Screening the reaction conditions

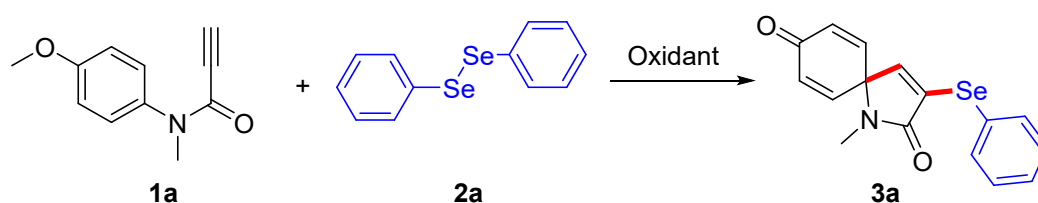

**Table S1** Screening the molar ratio of **1a** and **2a**<sup>a</sup>

| Entry | the molar ratio of <b>1a</b> and <b>2a</b> | Yields (%) <sup>b</sup> |
|-------|--------------------------------------------|-------------------------|
| 1     | 1 : 0.5                                    | 40                      |
| 2     | 1 : 1.0                                    | 75                      |
| 3     | 1 : 1.5                                    | 72                      |
| 4     | 1 : 2.0                                    | 69                      |

<sup>a</sup> Reaction conditions: *N*-(4-methoxyphenyl)-*N*-methylpropiolamide **1a** (0.2 mmol, 37.8 mg), diphenyl diselenide **2a**, Selectfluor agen (0.2 mmol, 70.8 mg) in  $\text{CH}_3\text{CN}$  (2.0 mL) at 40 °C for 4.0 h.

<sup>b</sup> Isolated yield.

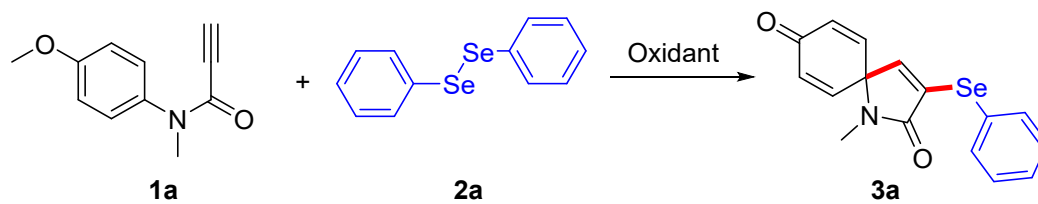

**Table S2** Screening the molar ratio of **1a** and **2a**<sup>a</sup>

| Entry | Reaction temperature (°C) | Yields (%) <sup>b</sup> |
|-------|---------------------------|-------------------------|
| 1     | 20                        | 40                      |
| 2     | 40                        | 75                      |
| 3     | 60                        | 75                      |
| 4     | 80                        | 72                      |

<sup>a</sup> Reaction conditions: *N*-(4-methoxyphenyl)-*N*-methylpropiolamide **1a** (0.2 mmol, 37.8 mg), diphenyl diselenide **2a** (0.2 mmol, 62.8 mg), Selectfluor agen (0.2 mmol, 70.8 mg) in CH<sub>3</sub>CN (2.0 mL) for 4.0 h.

<sup>b</sup> Isolated yield.

### 3 Copies of spectra of products

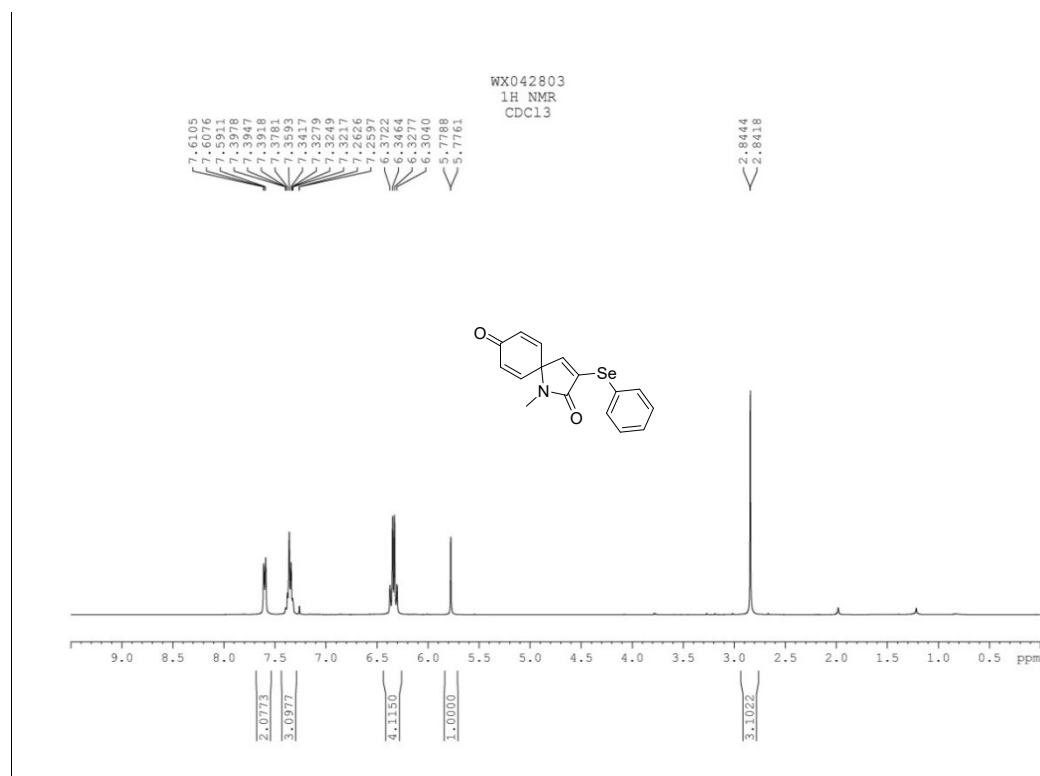

**Fig. 1** <sup>1</sup>H NMR spectrum of compound **3a**

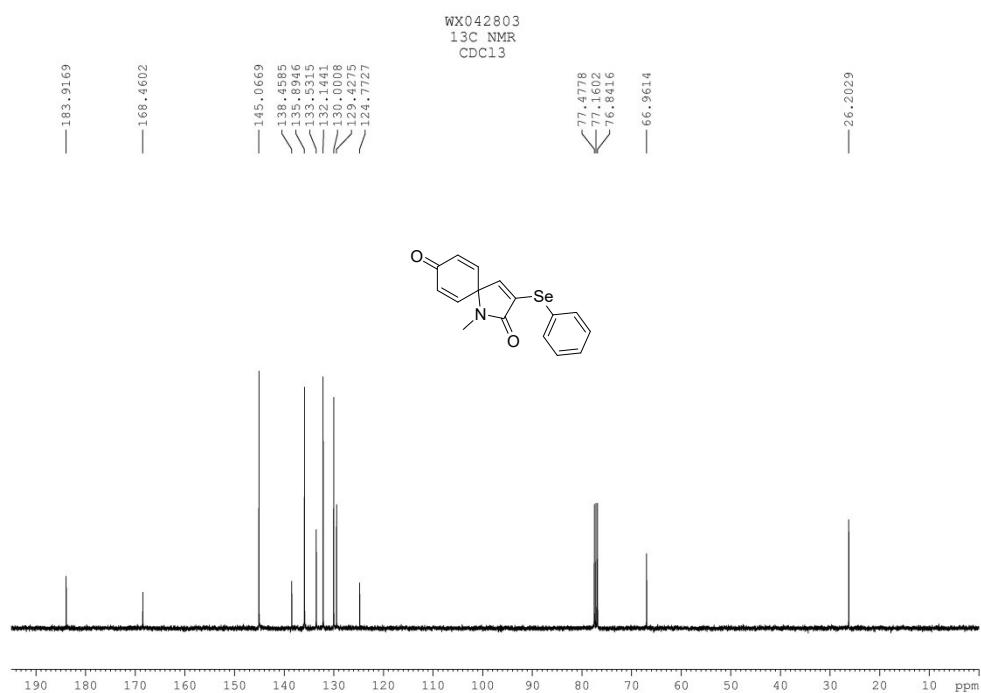

Fig. 2 <sup>13</sup>C NMR spectrum of compound 3a

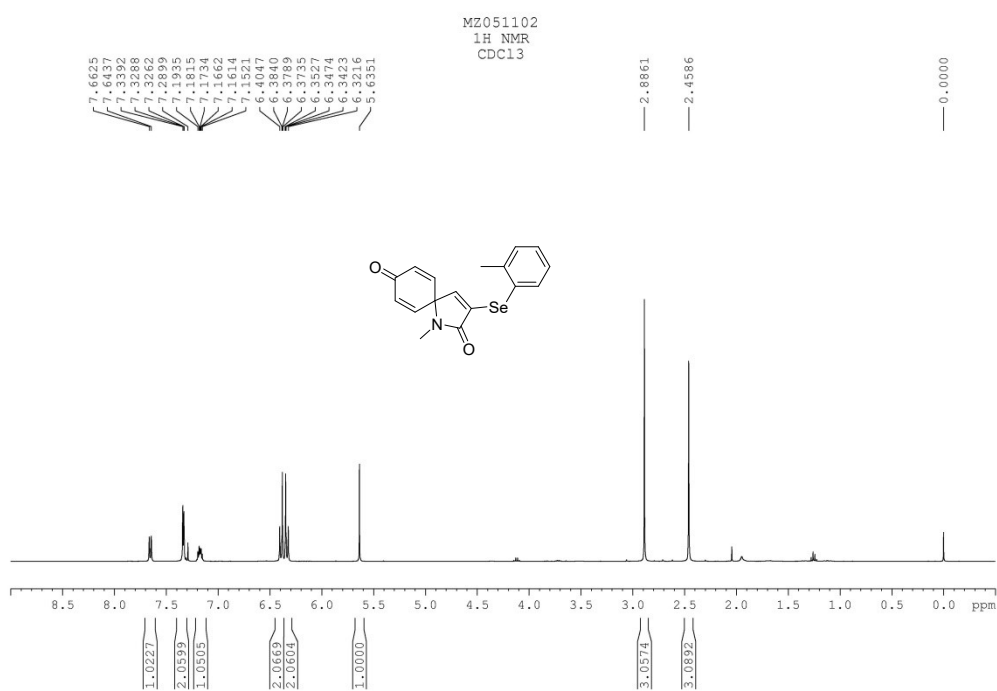

Fig. 3 <sup>1</sup>H NMR spectrum of compound 3b

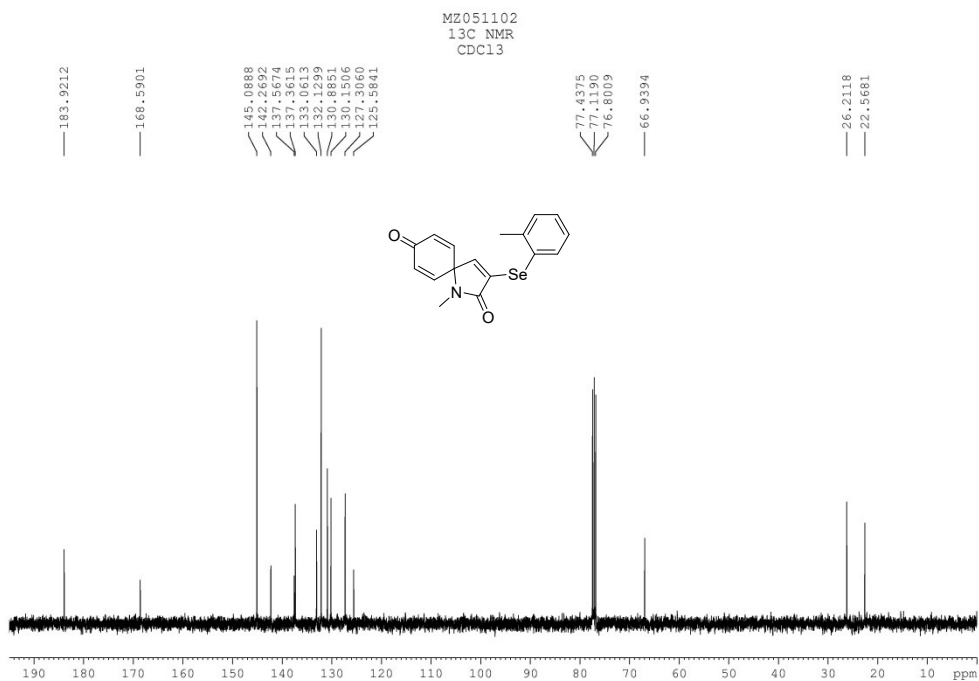

Fig. 4 <sup>13</sup>C NMR spectrum of compound 3b

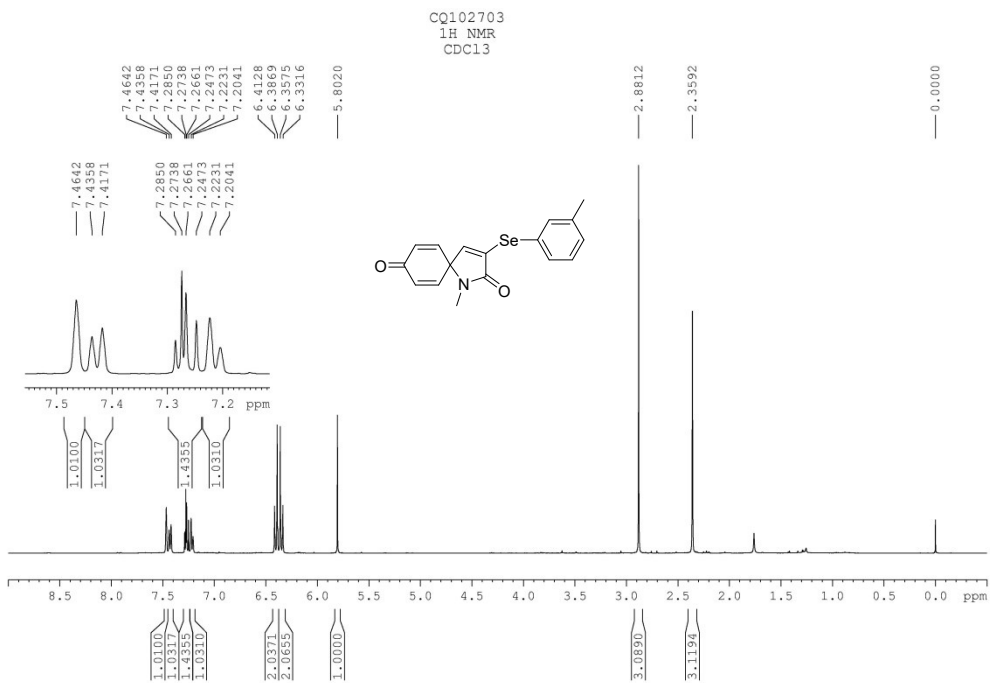

Fig. 5 <sup>1</sup>H NMR spectrum of compound 3c

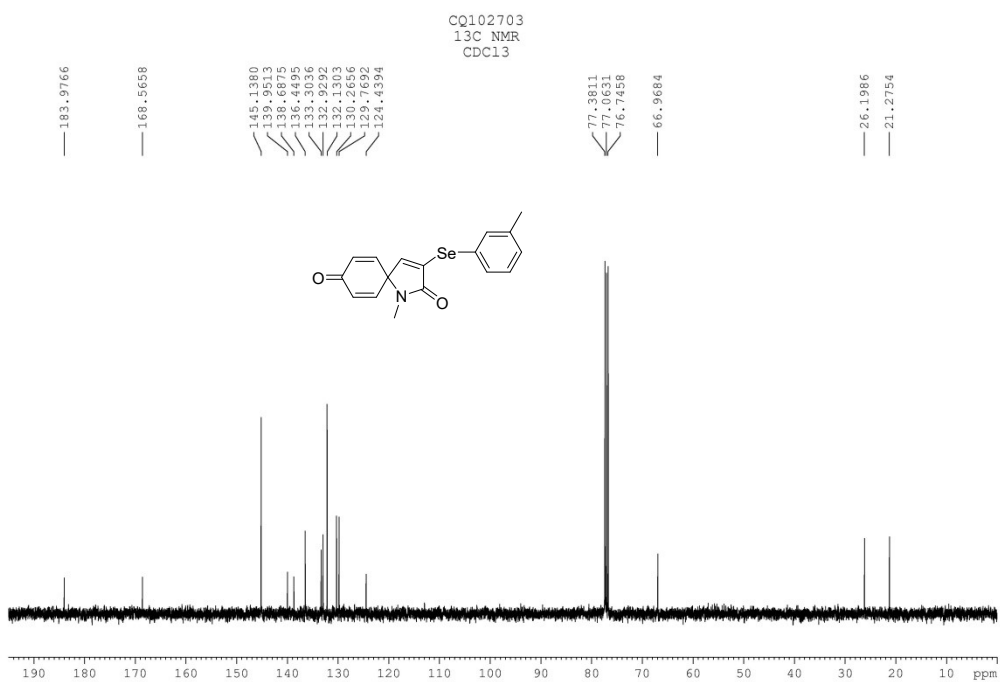

Fig. 6 <sup>13</sup>C NMR spectrum of compound 3c

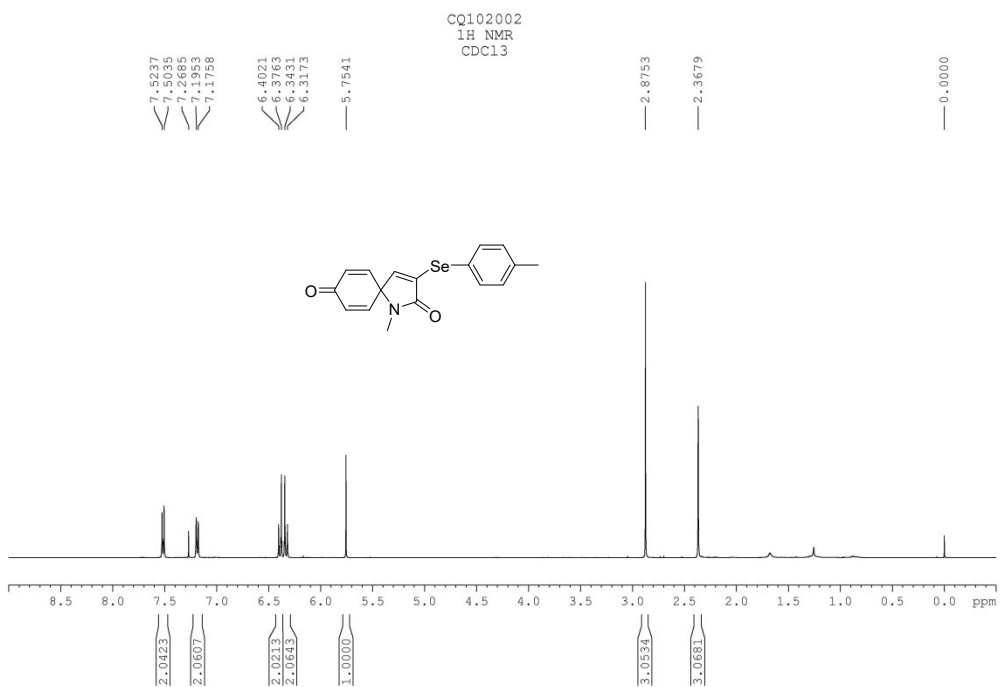

Fig. 7 <sup>1</sup>H NMR spectrum of compound 3d

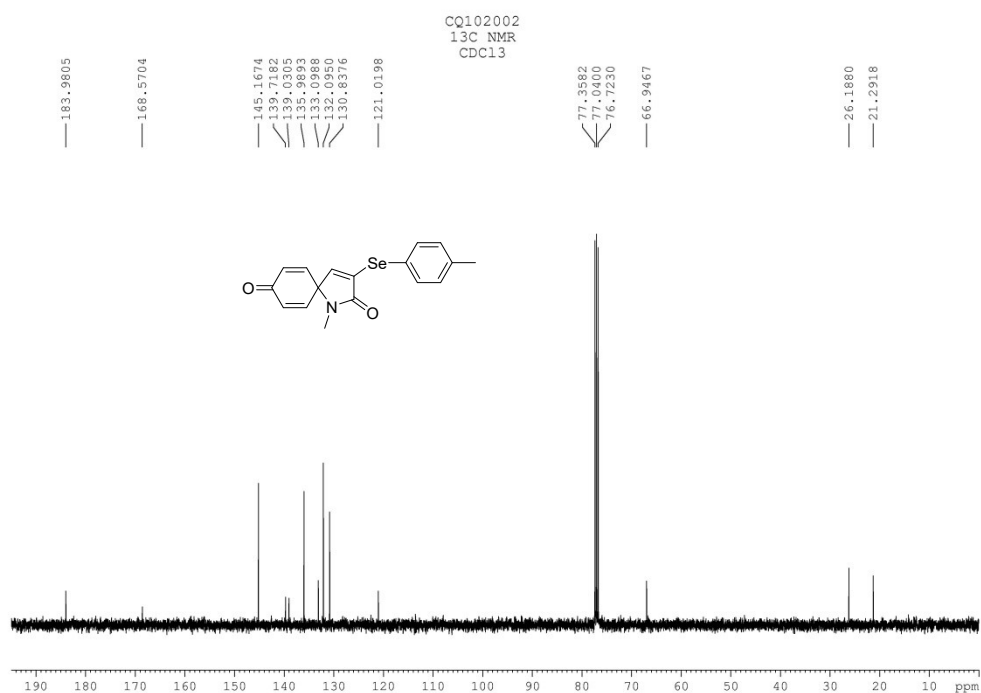

**Fig. 8**  $^{13}\text{C}$  NMR spectrum of compound **3d**

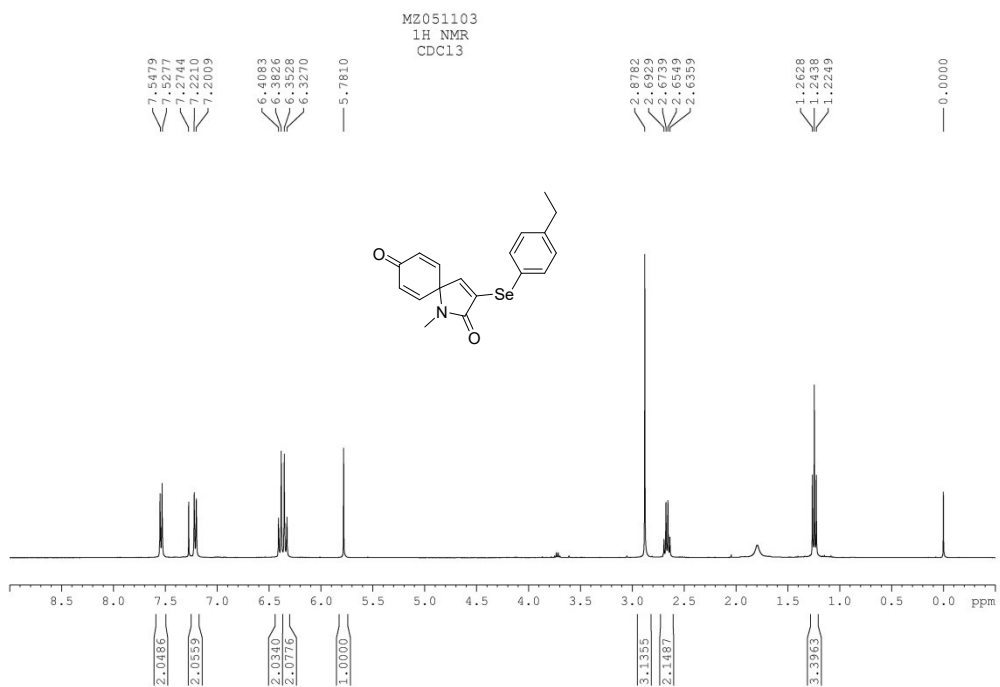

**Fig. 9**  $^1\text{H}$  NMR spectrum of compound **3e**

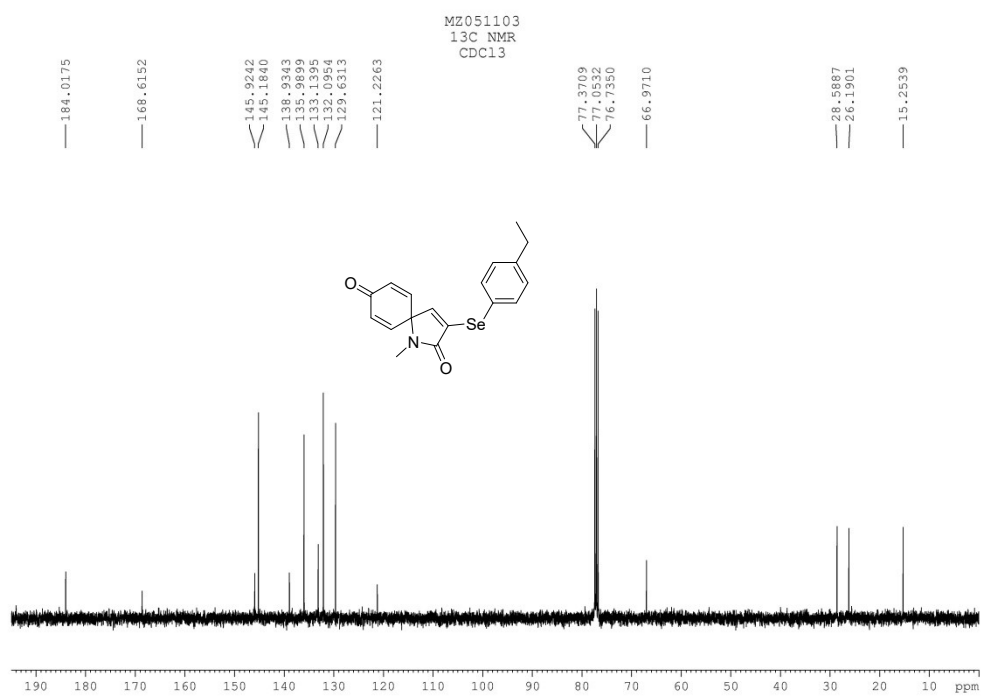

Fig. 10  $^{13}\text{C}$  NMR spectrum of compound 3e

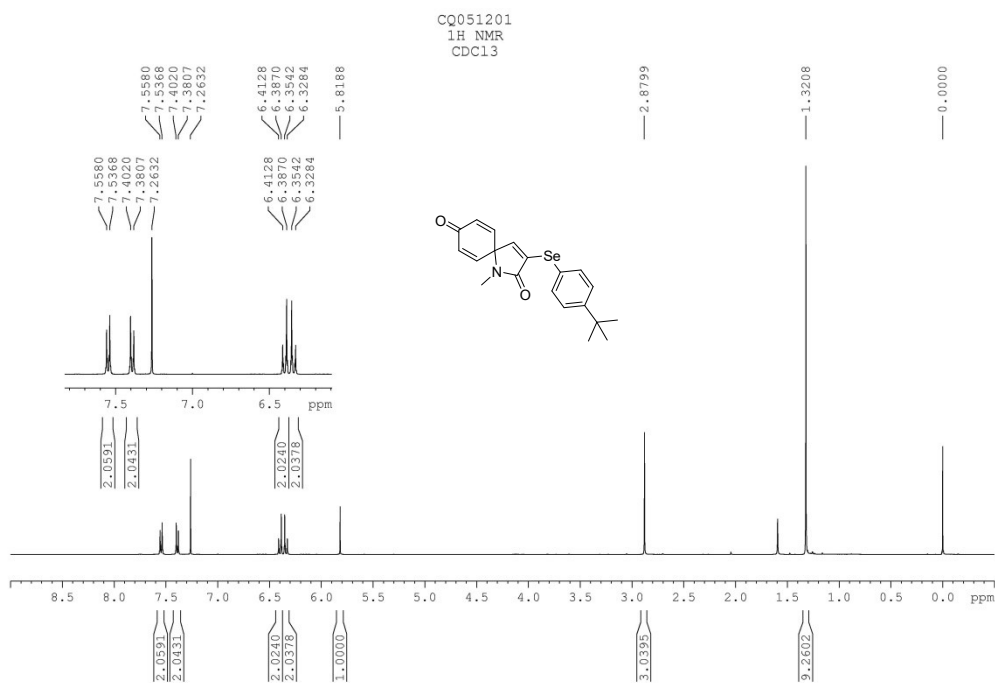

Fig. 11  $^1\text{H}$  NMR spectrum of compound 3f



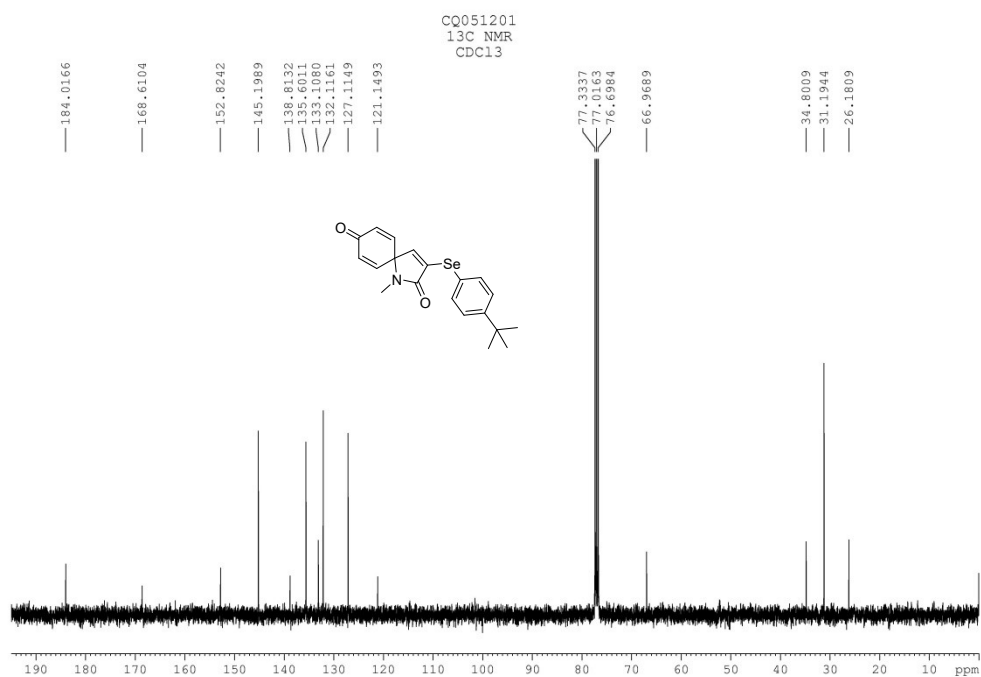

Fig. 12  $^{13}\text{C}$  NMR spectrum of compound 3f

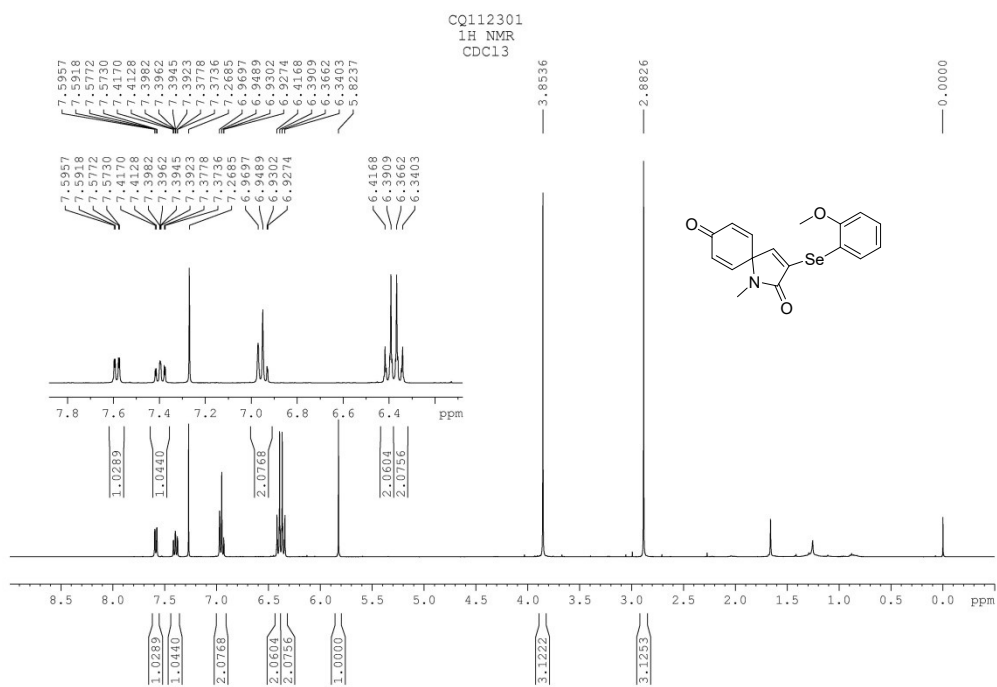

Fig. 13  $^1\text{H}$  NMR spectrum of compound 3g

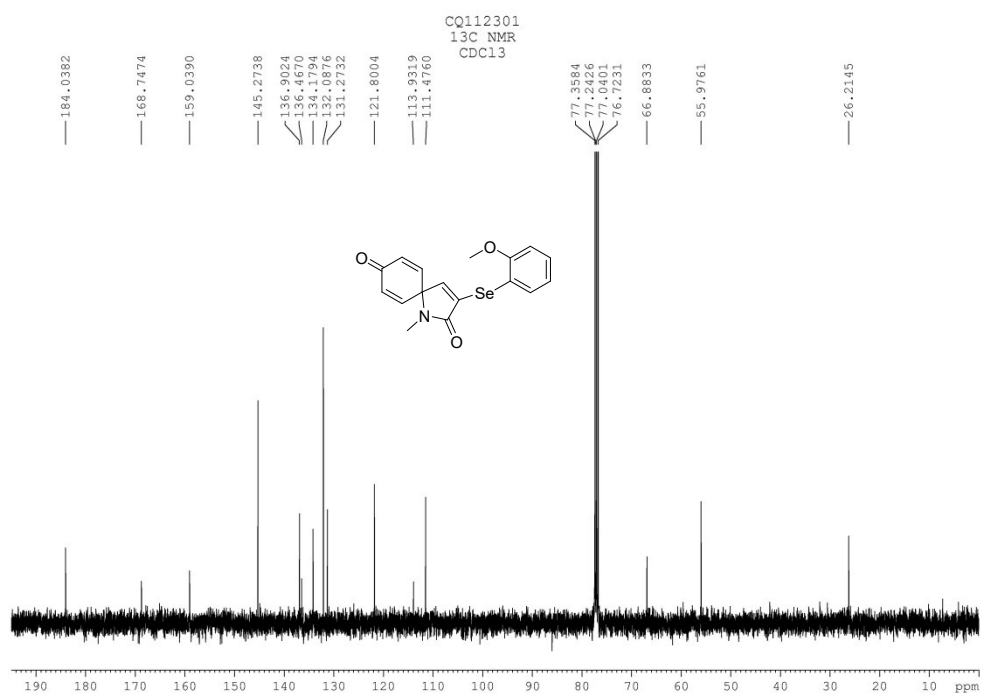

**Fig. 14** <sup>13</sup>C NMR spectrum of compound **3g**

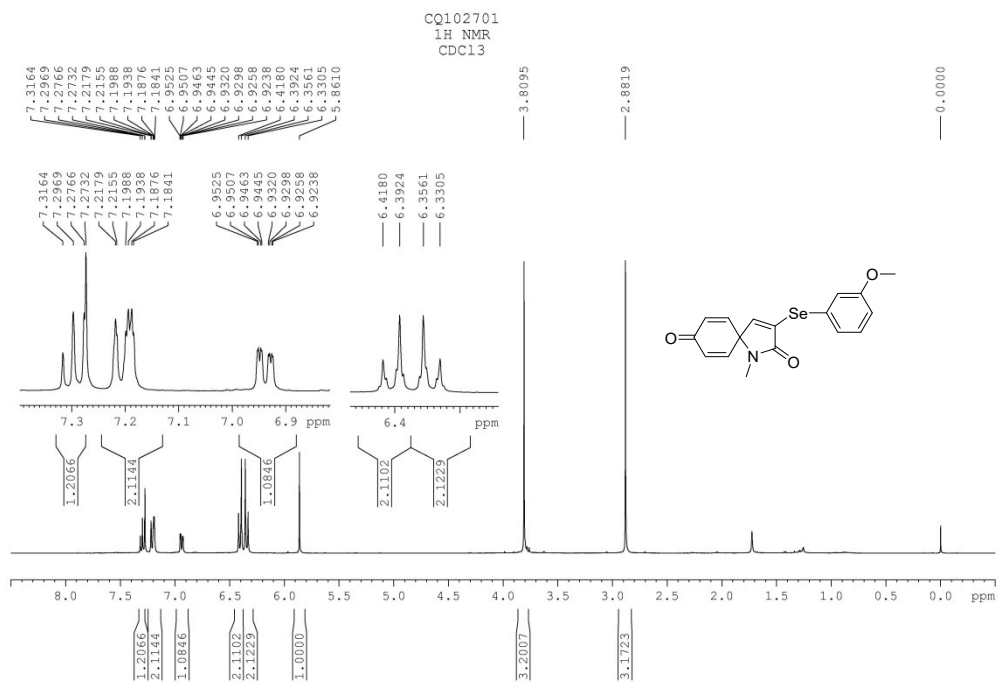

**Fig. 15** <sup>1</sup>H NMR spectrum of compound **3h**

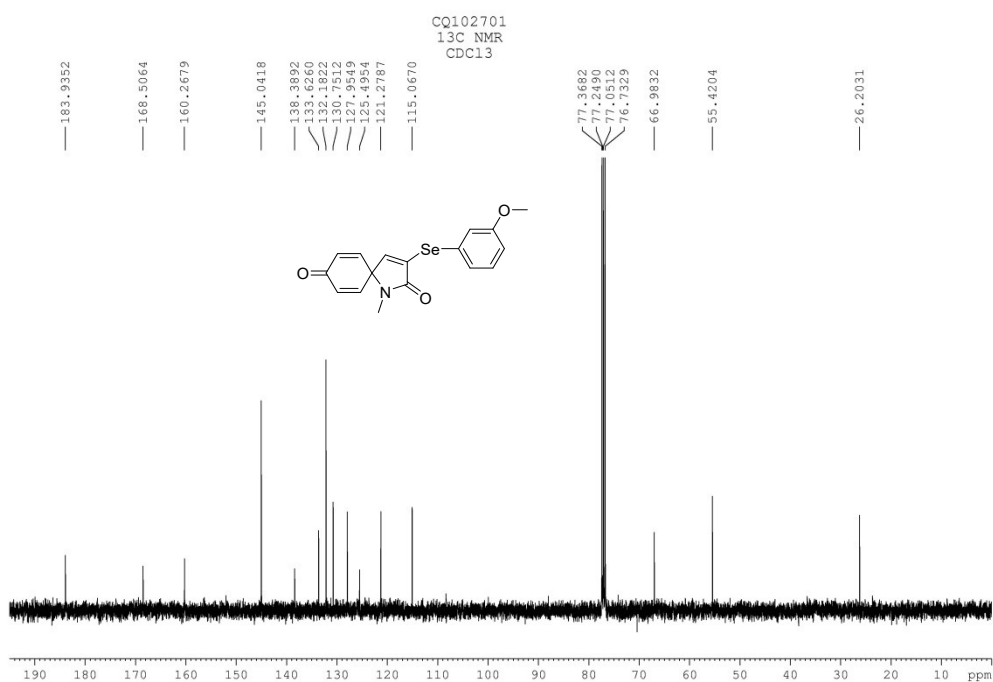

Fig. 16 <sup>13</sup>C NMR spectrum of compound 3h

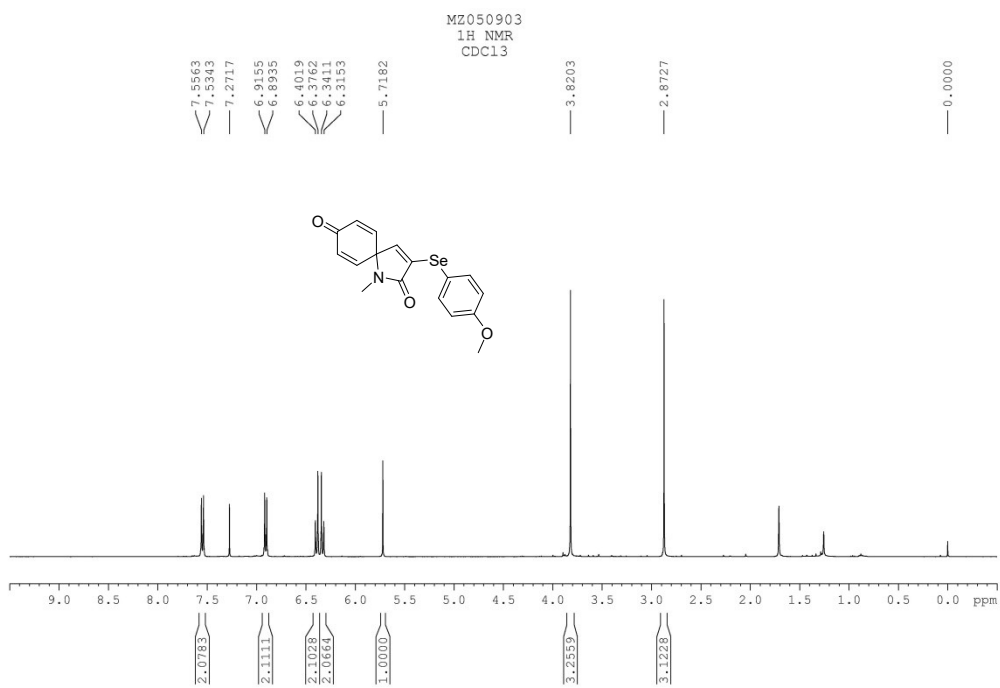

Fig. 17 <sup>1</sup>H NMR spectrum of compound 3i

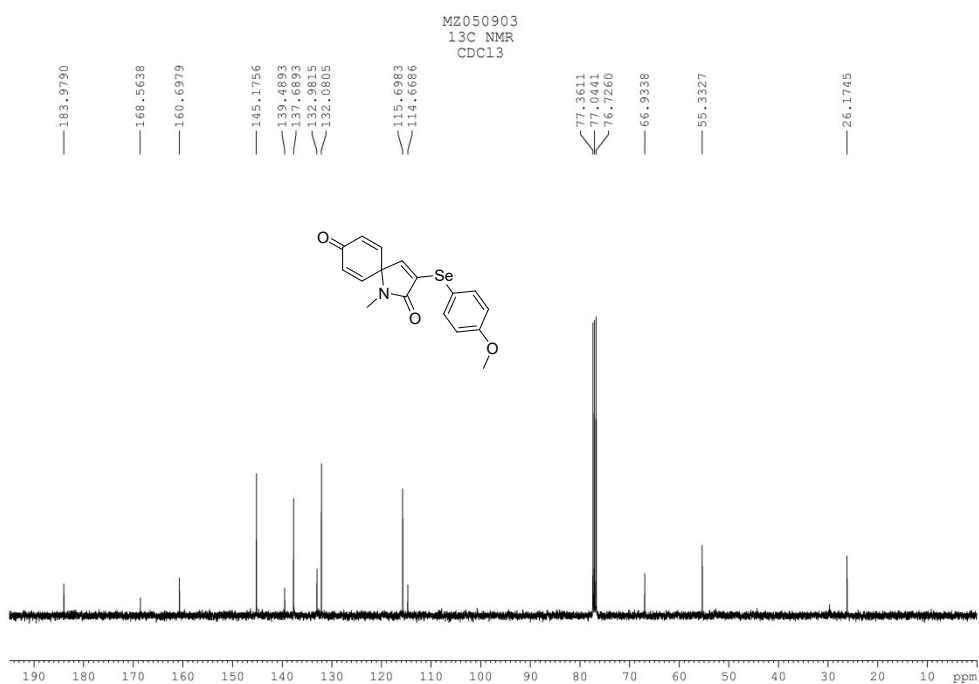

Fig. 18 <sup>13</sup>C NMR spectrum of compound 3i

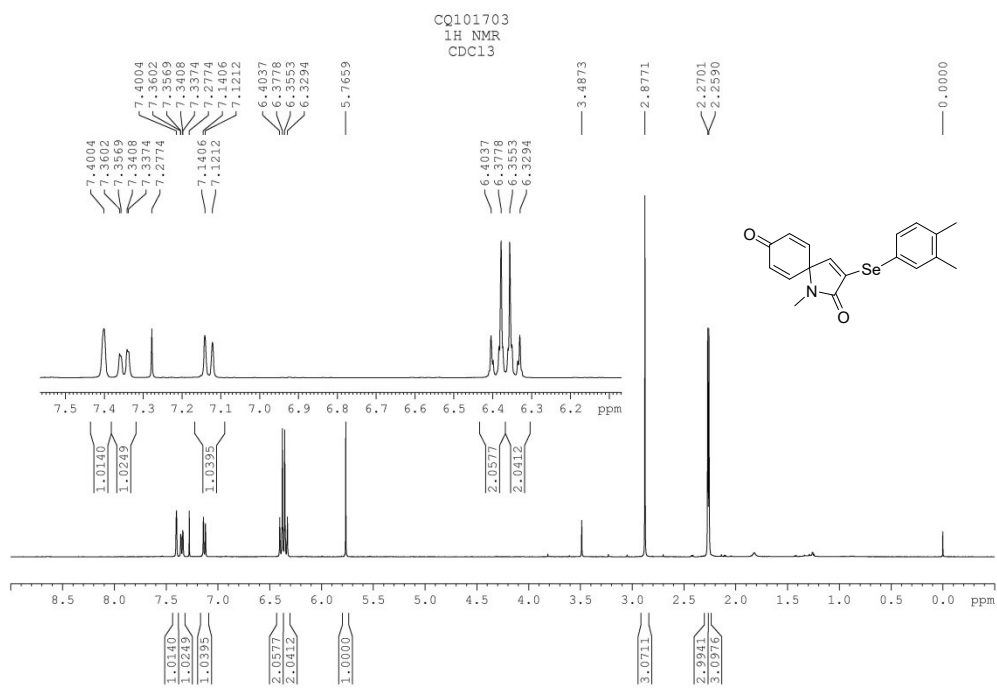

Fig. 19 <sup>1</sup>H NMR spectrum of compound 3j

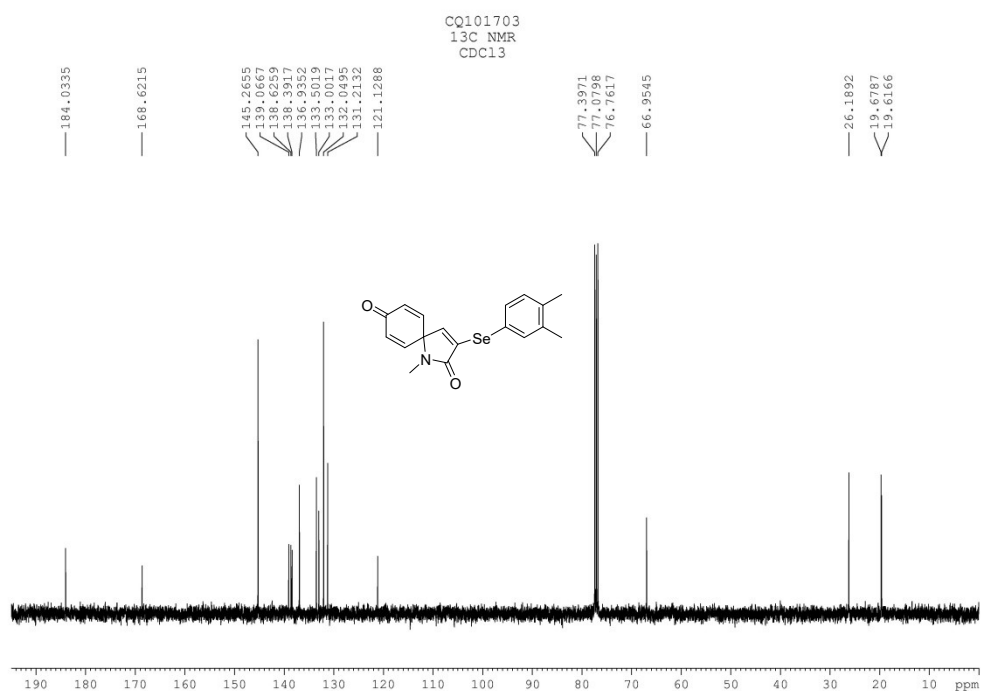

Fig. 20 <sup>13</sup>C NMR spectrum of compound 3j

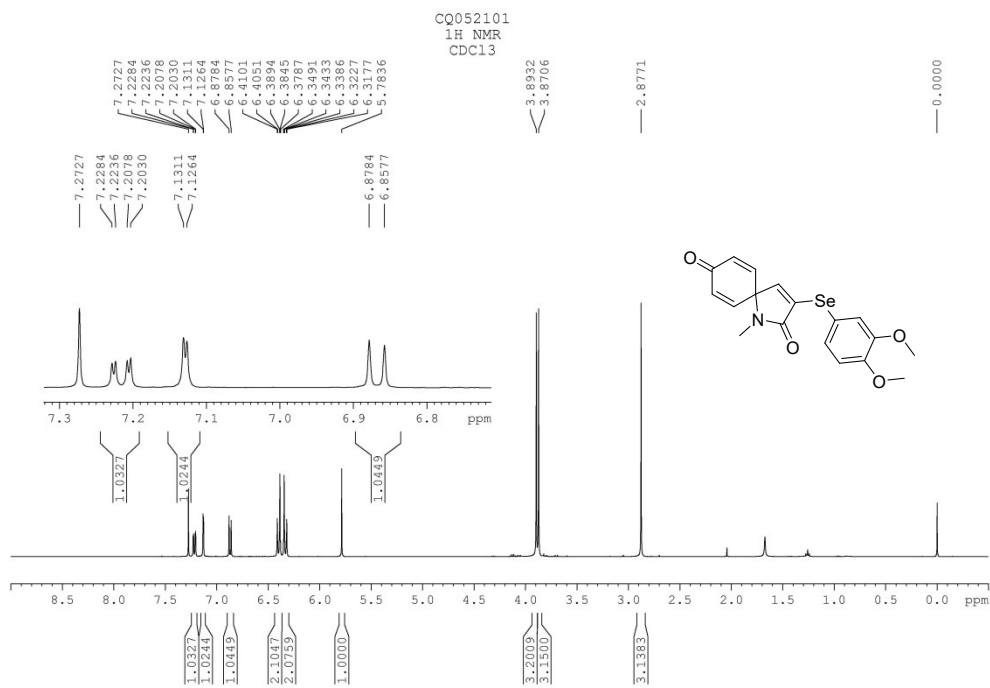

Fig. 21 <sup>1</sup>H NMR spectrum of compound 3k

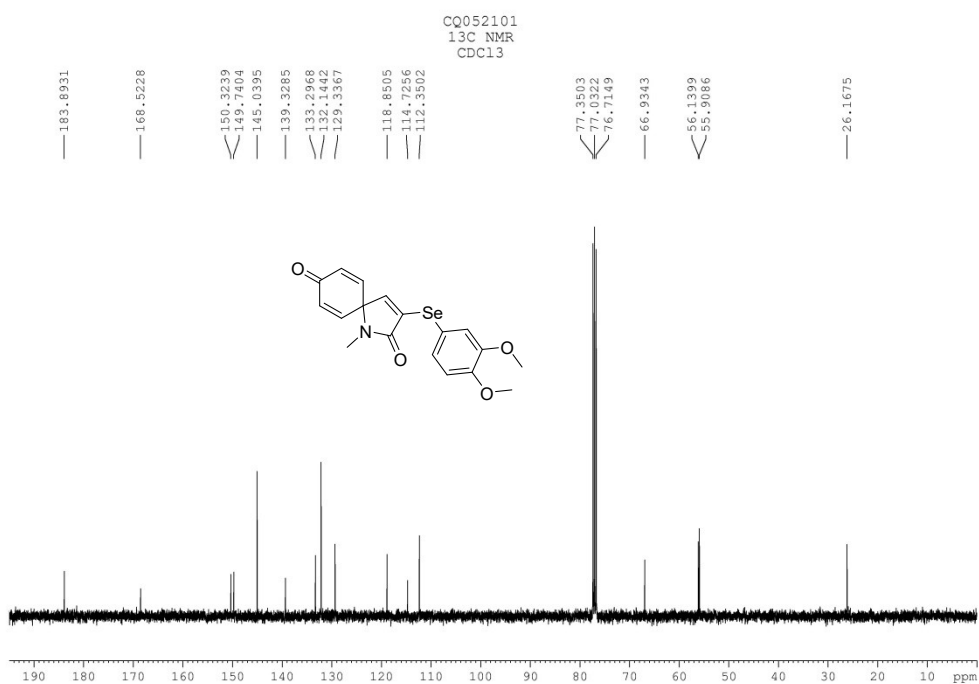

**Fig. 22**  $^{13}\text{C}$  NMR spectrum of compound **3k**

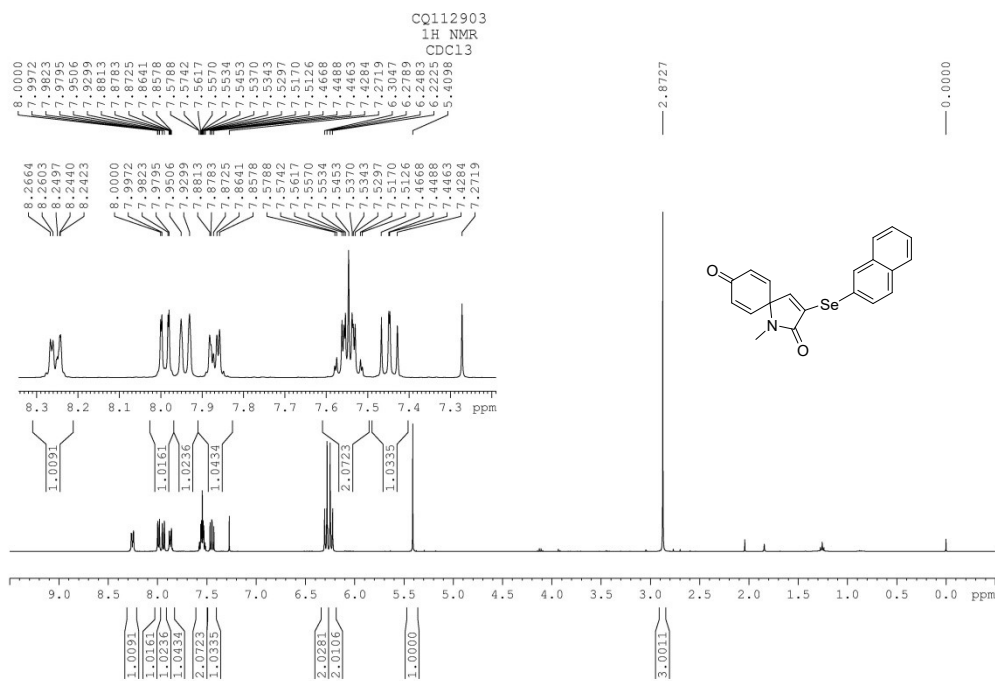

**Fig. 23**  $^1\text{H}$  NMR spectrum of compound **3l**

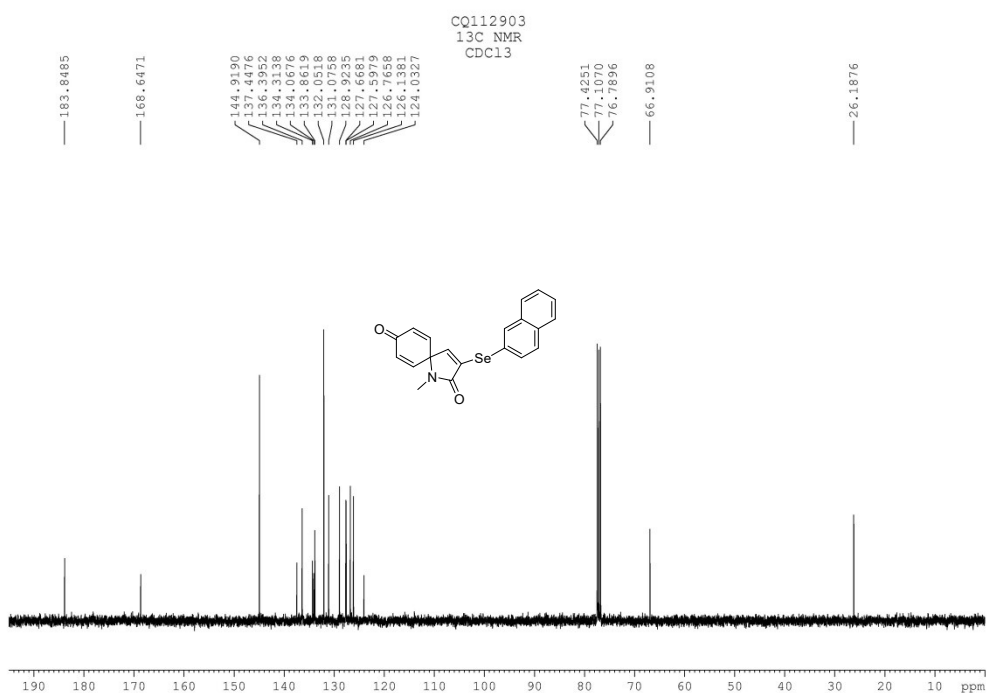

Fig. 24 <sup>13</sup>C NMR spectrum of compound 3l

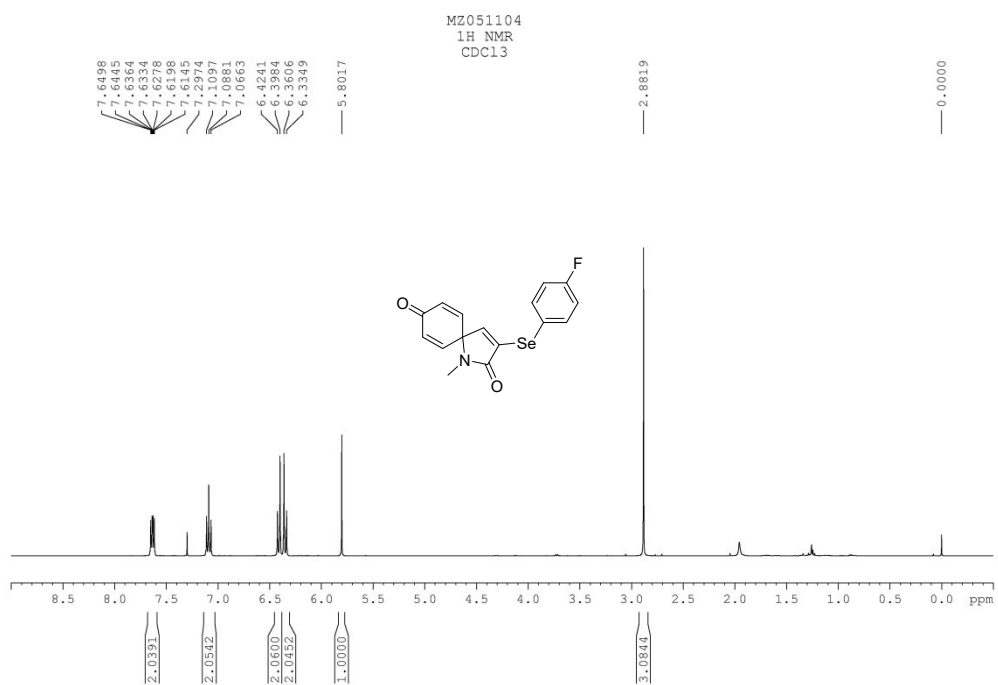

Fig. 25 <sup>1</sup>H NMR spectrum of compound 3m

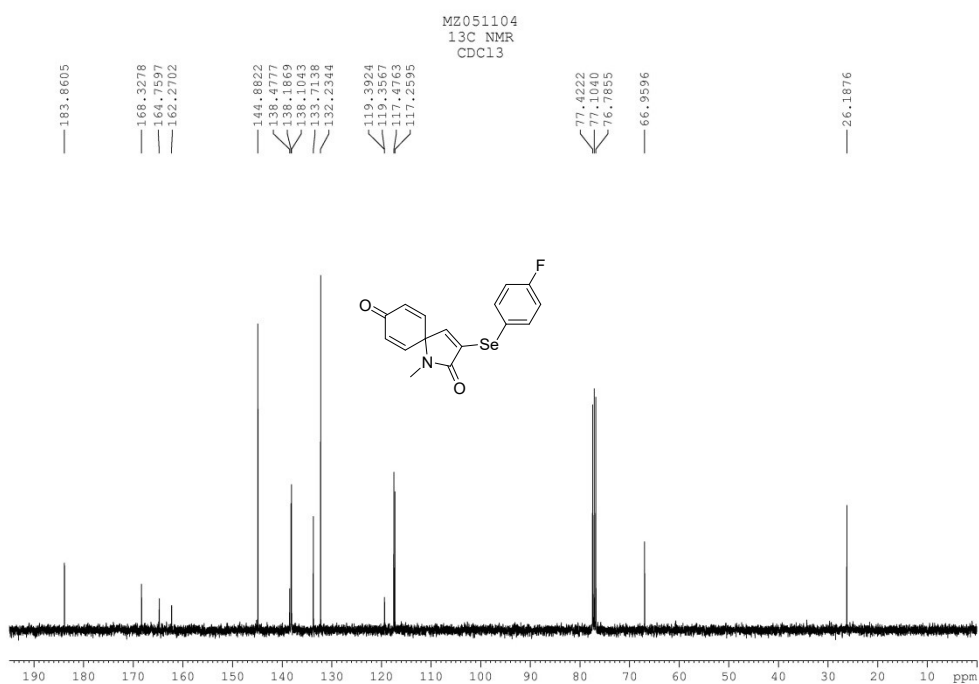

Fig. 26 <sup>13</sup>C NMR spectrum of compound **3m**

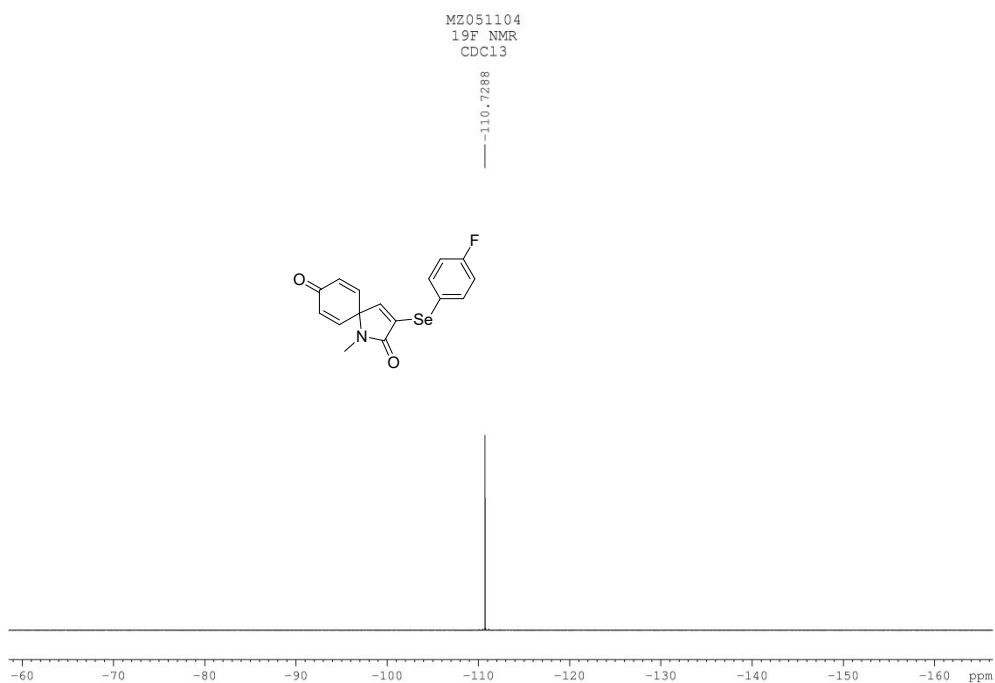

Fig. 27 <sup>19</sup>F NMR spectrum of compound **3m**



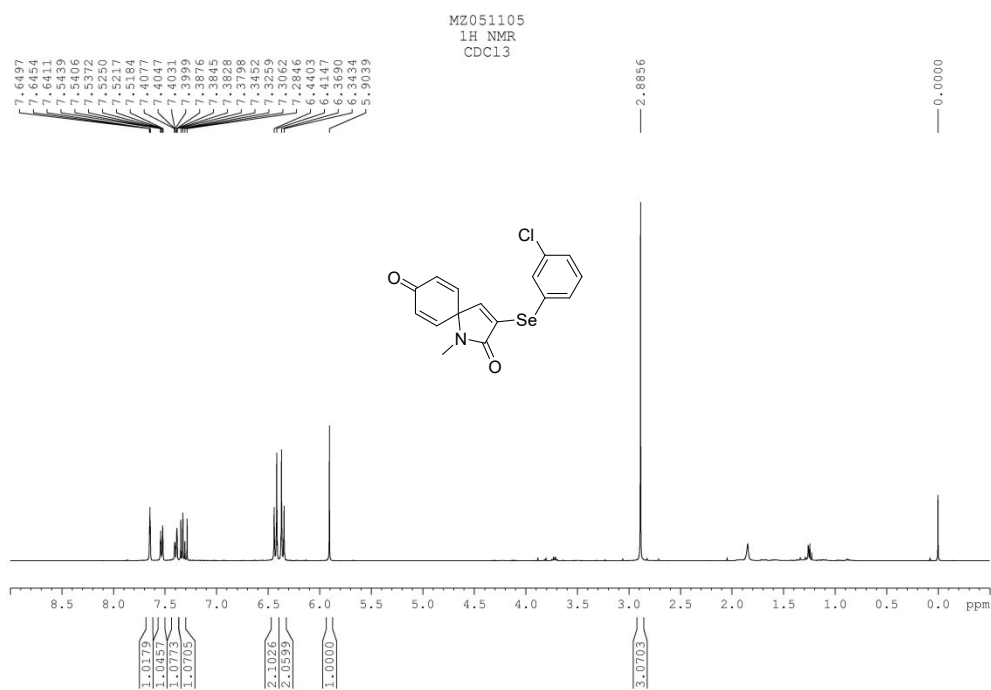

Fig. 28  $^1\text{H}$  NMR spectrum of compound **3n**

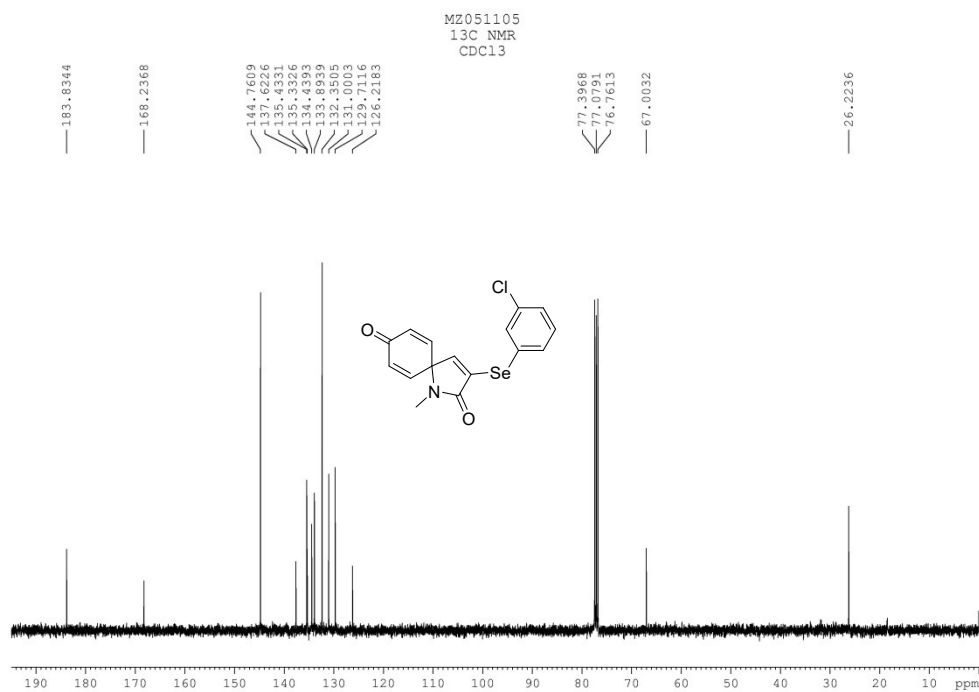

Fig. 29  $^{13}\text{C}$  NMR spectrum of compound **3n**

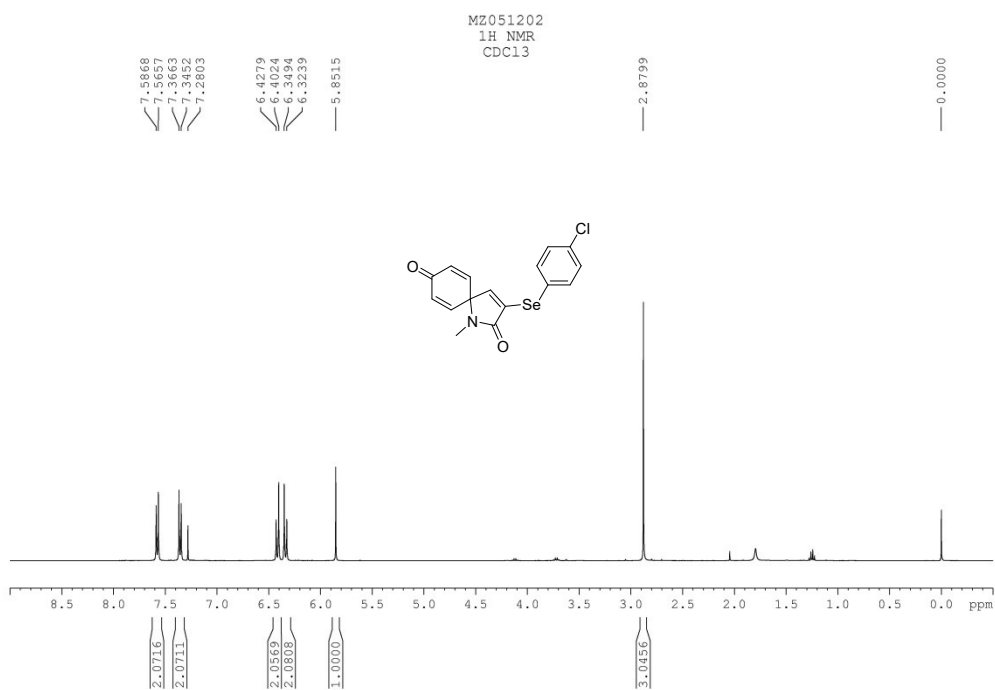

**Fig. 30**  $^1\text{H}$  NMR spectrum of compound **3o**

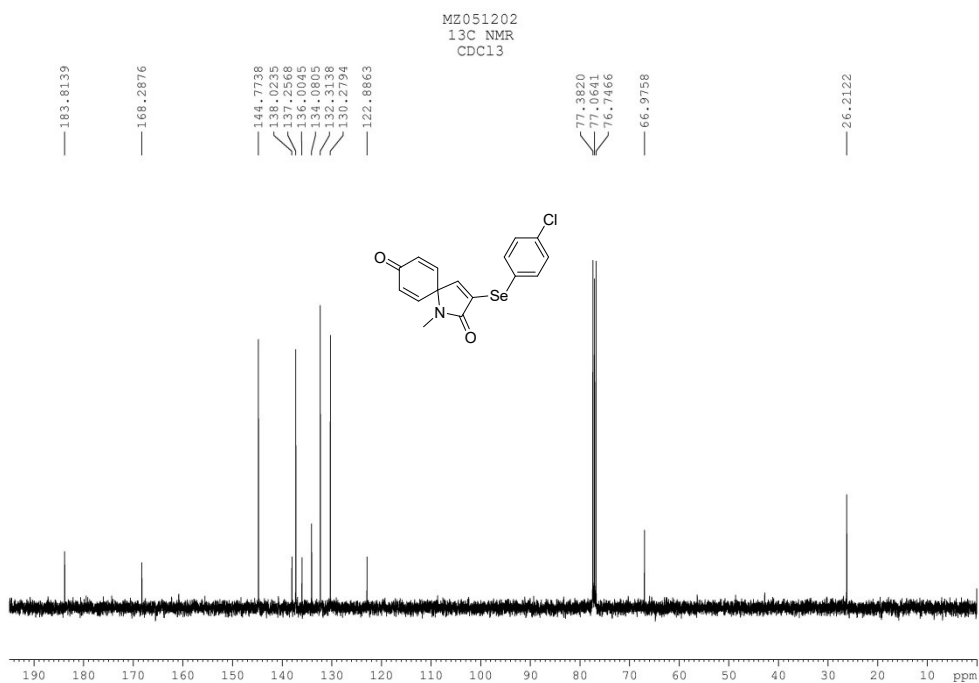

**Fig. 31**  $^{13}\text{C}$  NMR spectrum of compound **3o**

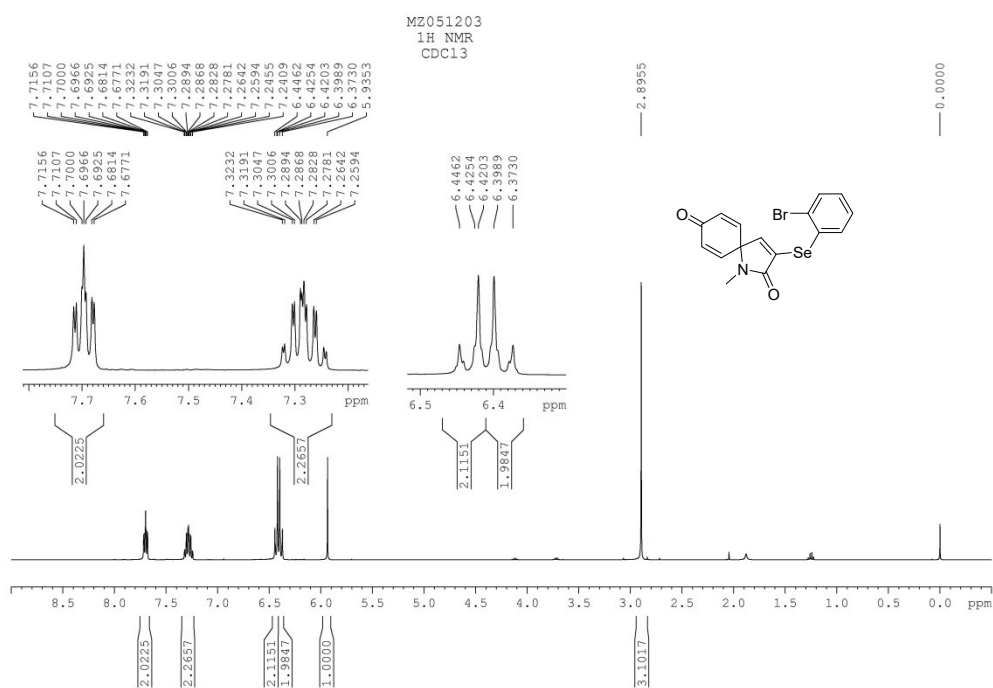

Fig. 32  $^1\text{H}$  NMR spectrum of compound 3p

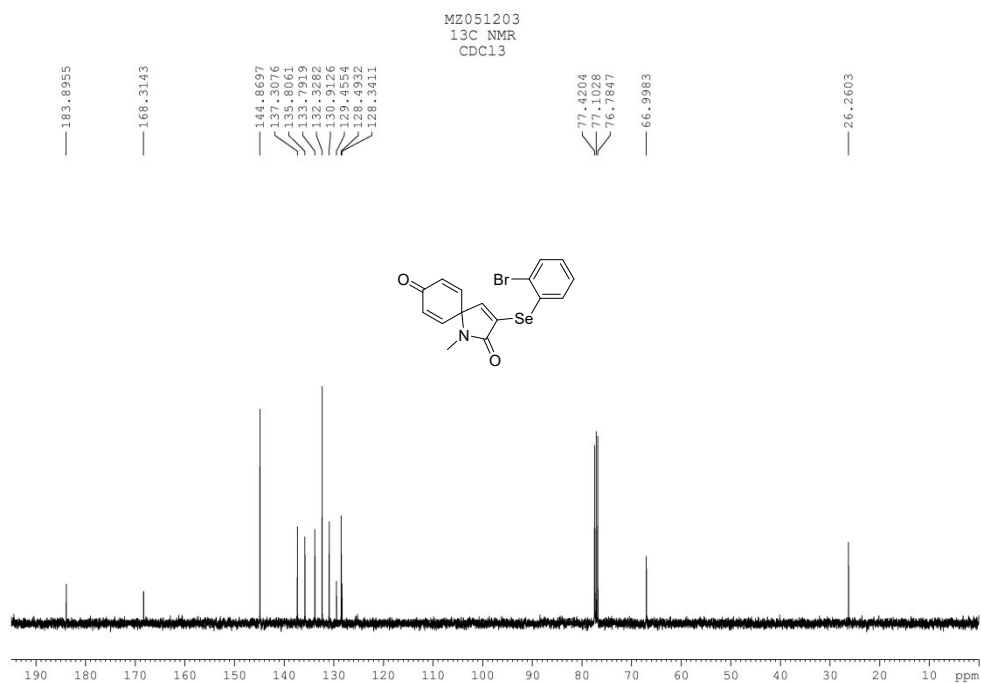

Fig. 33  $^{13}\text{C}$  NMR spectrum of compound 3p

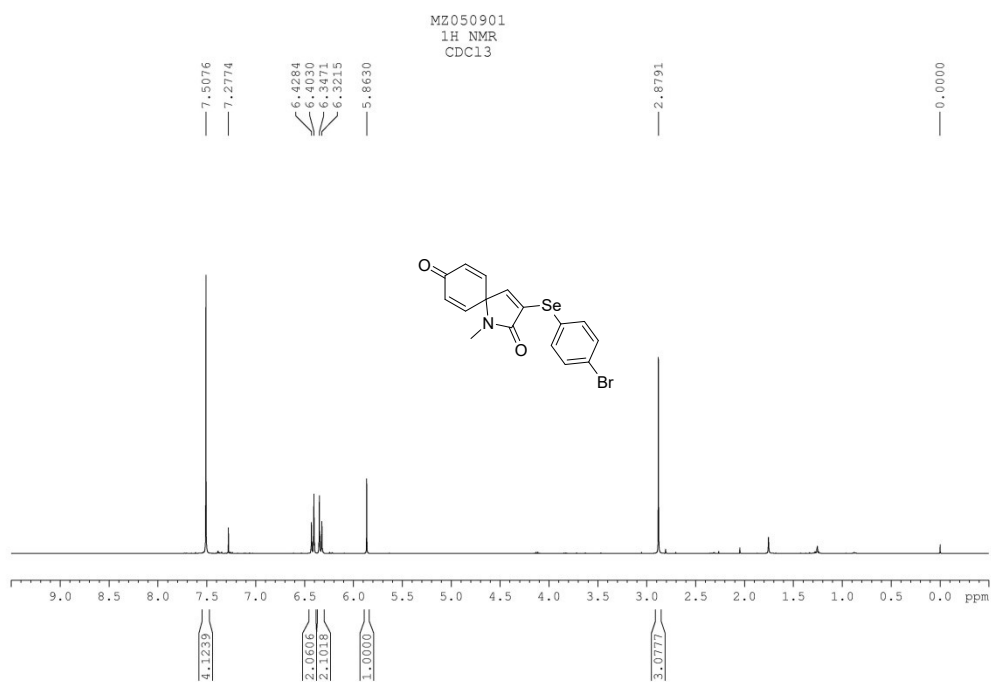

**Fig. 34**  $^1\text{H}$  NMR spectrum of compound **3q**

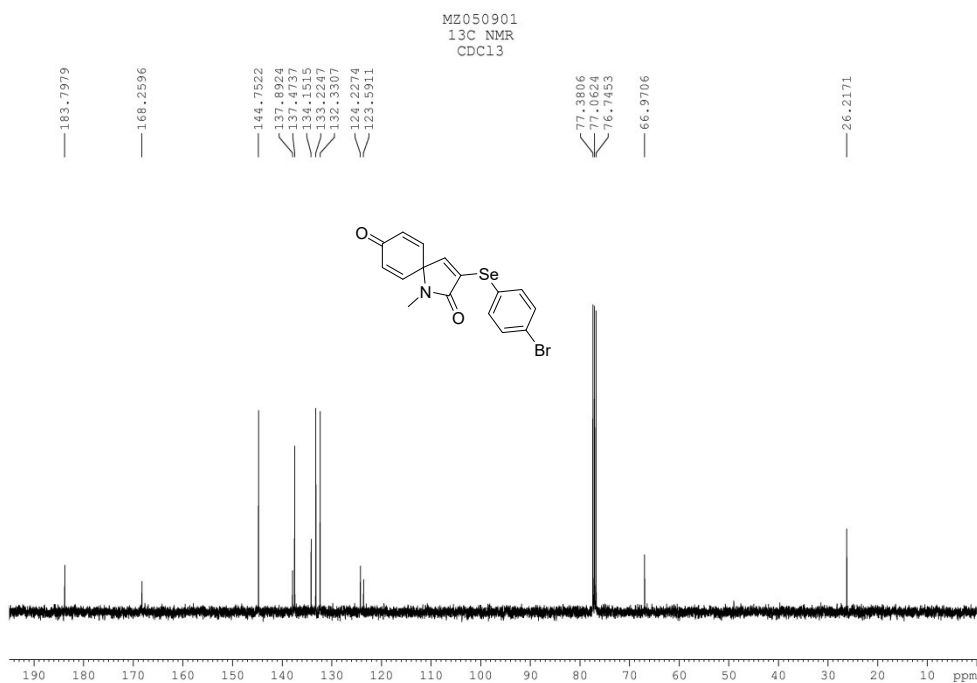

**Fig. 35**  $^{13}\text{C}$  NMR spectrum of compound **3q**

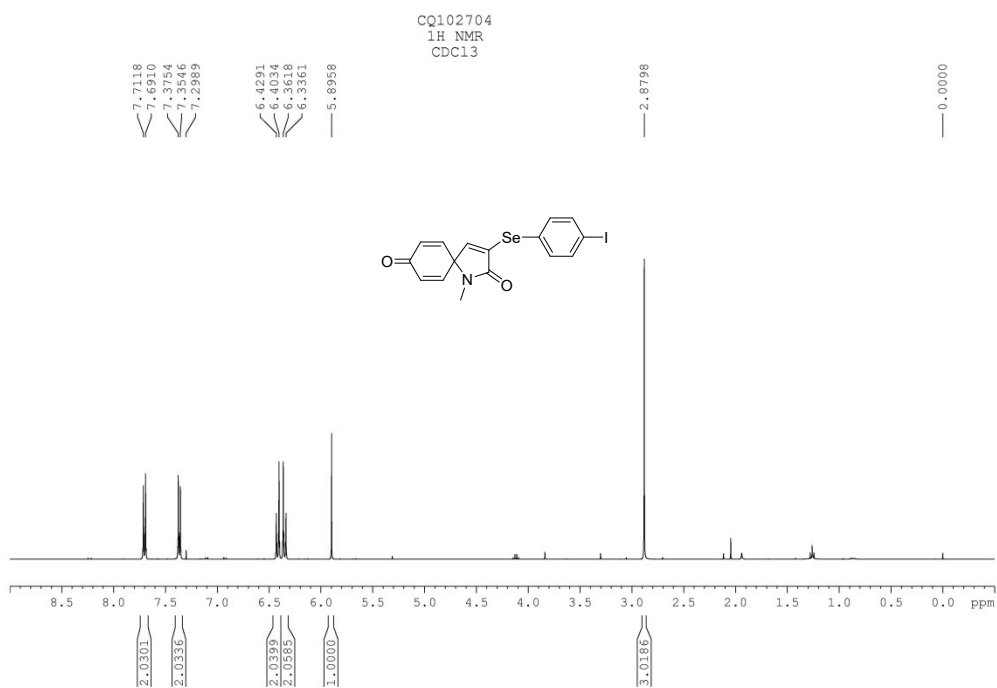

**Fig. 36**  $^1\text{H}$  NMR spectrum of compound **3r**

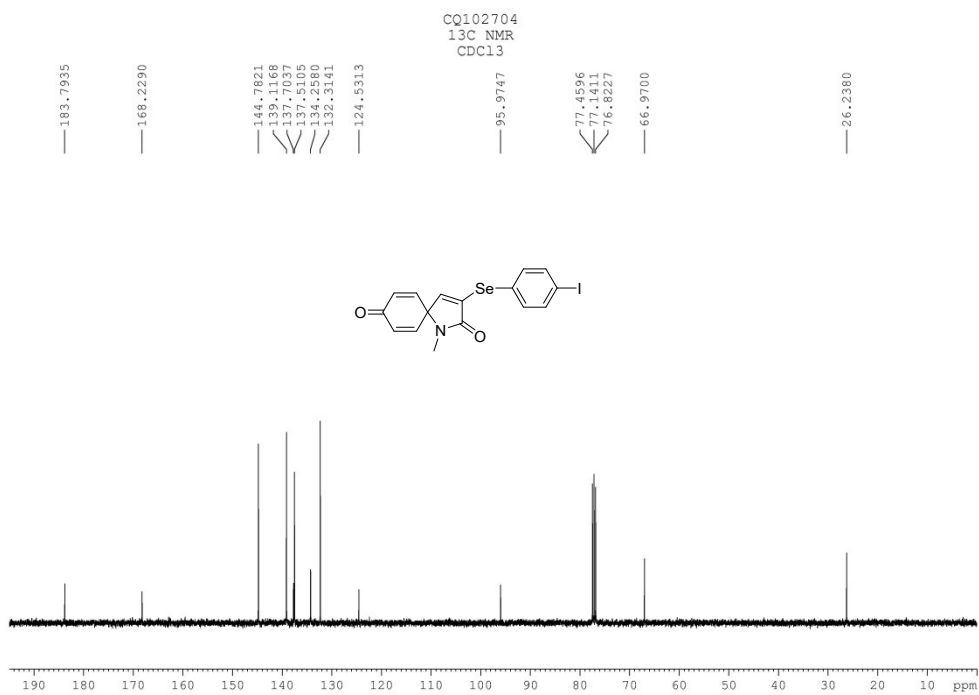

**Fig. 37**  $^{13}\text{C}$  NMR spectrum of compound **3r**

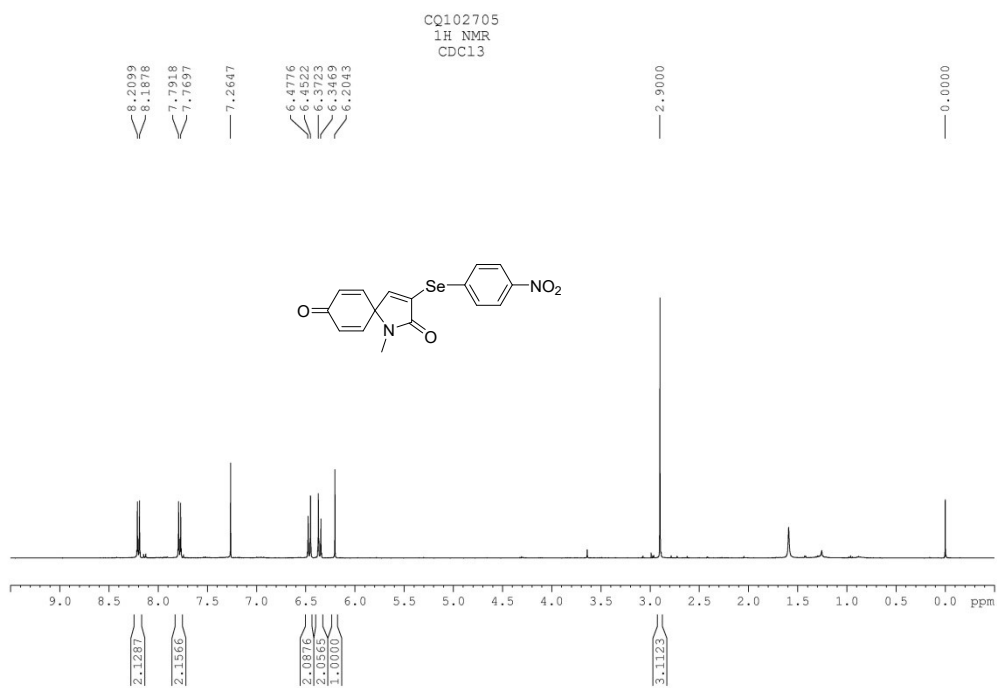

**Fig. 38** <sup>1</sup>H NMR spectrum of compound **3s**

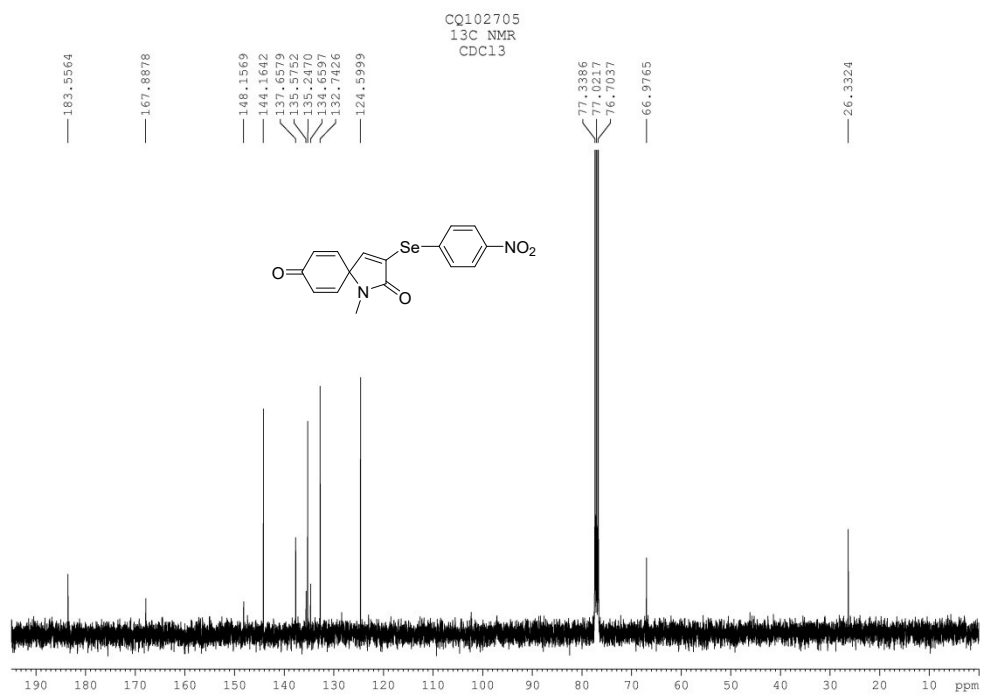

**Fig. 39** <sup>13</sup>C NMR spectrum of compound **3s**

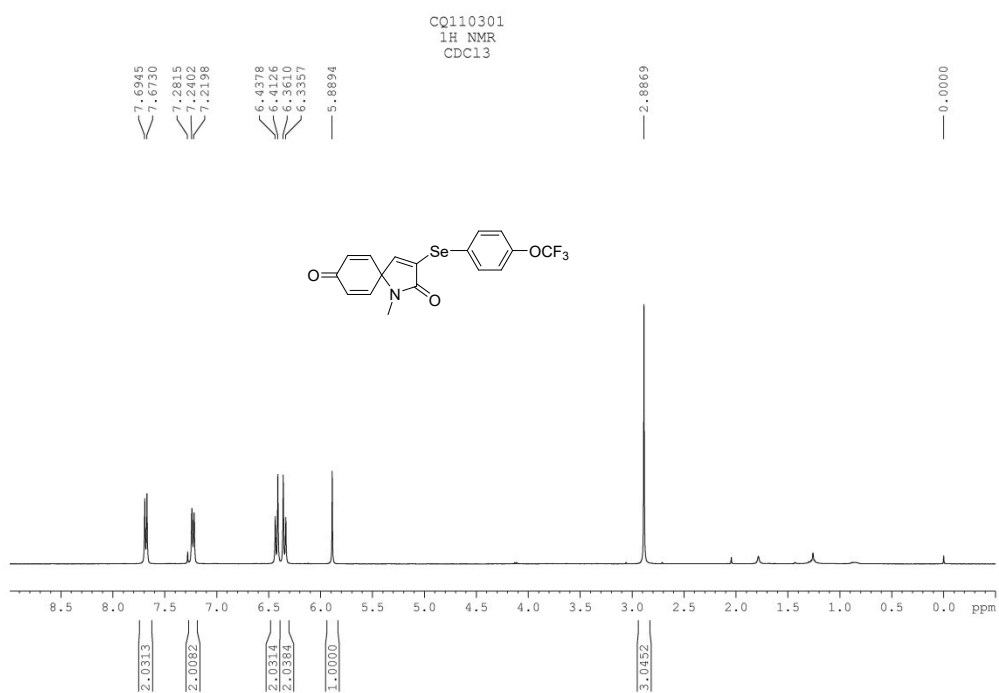

**Fig. 40** <sup>1</sup>H NMR spectrum of compound **3t**

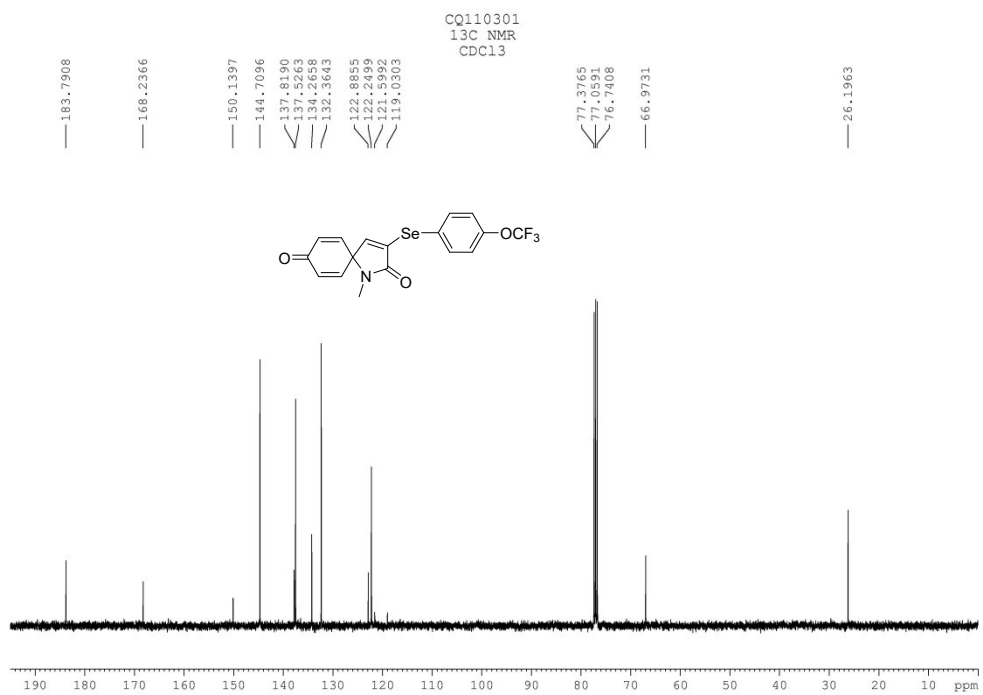

**Fig.41** <sup>13</sup>C NMR spectrum of compound **3t**

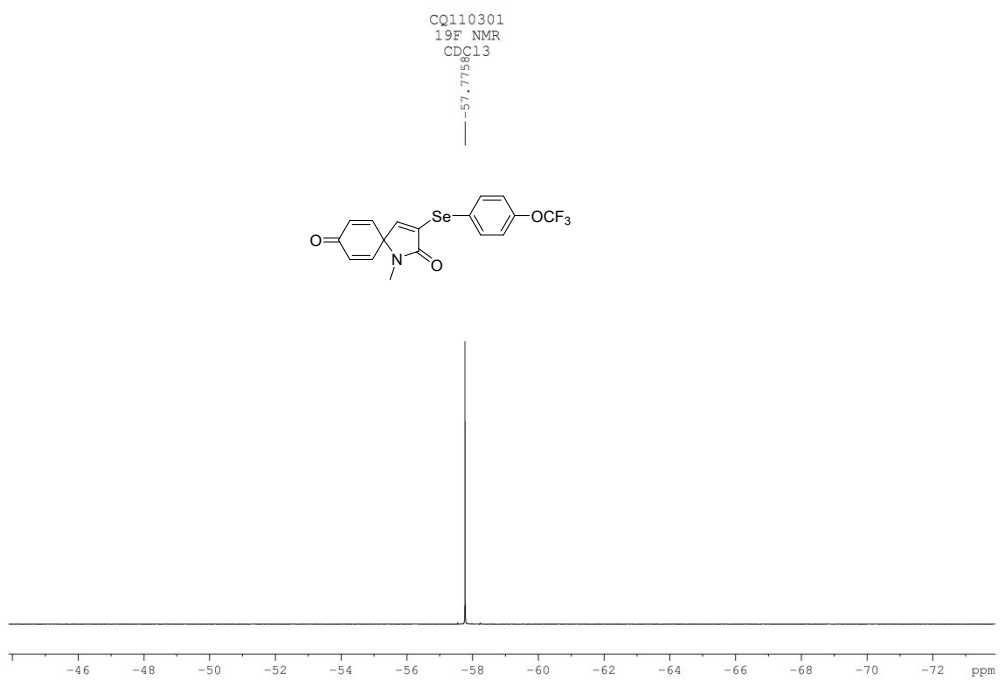

**Fig.42** <sup>19</sup>F NMR spectrum of compound **3t**

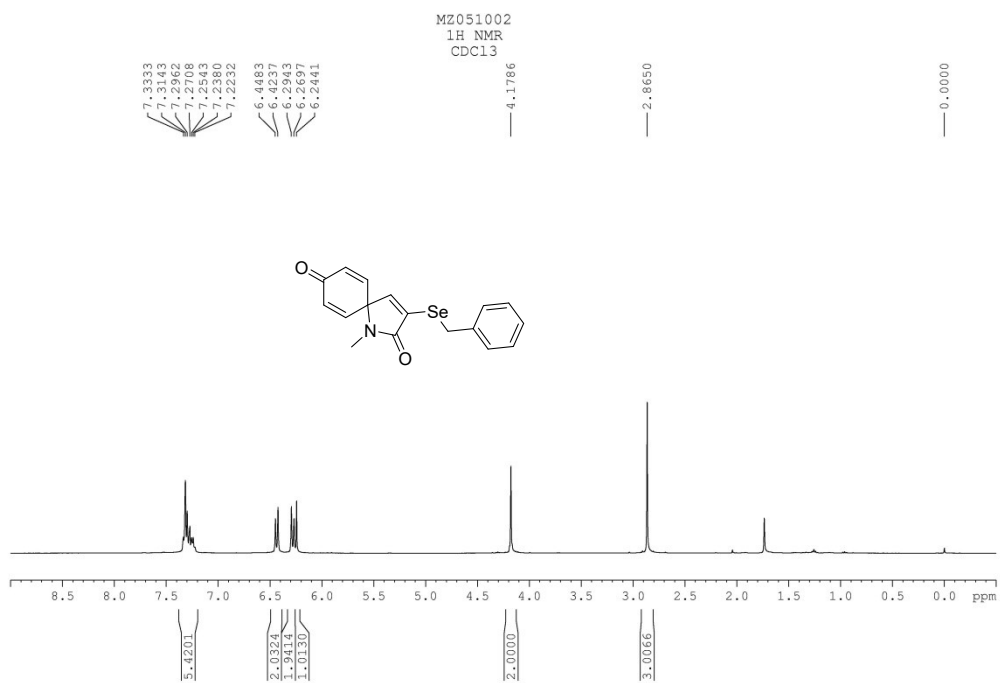

**Fig. 43** <sup>1</sup>H NMR spectrum of compound **3u**



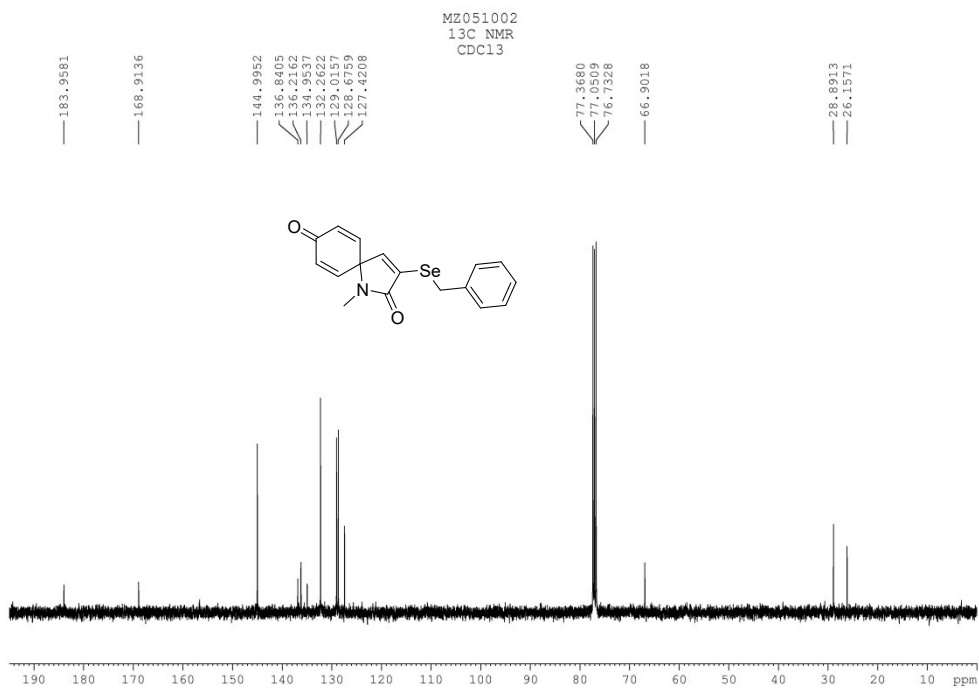

Fig. 44 <sup>13</sup>C NMR spectrum of compound 3u

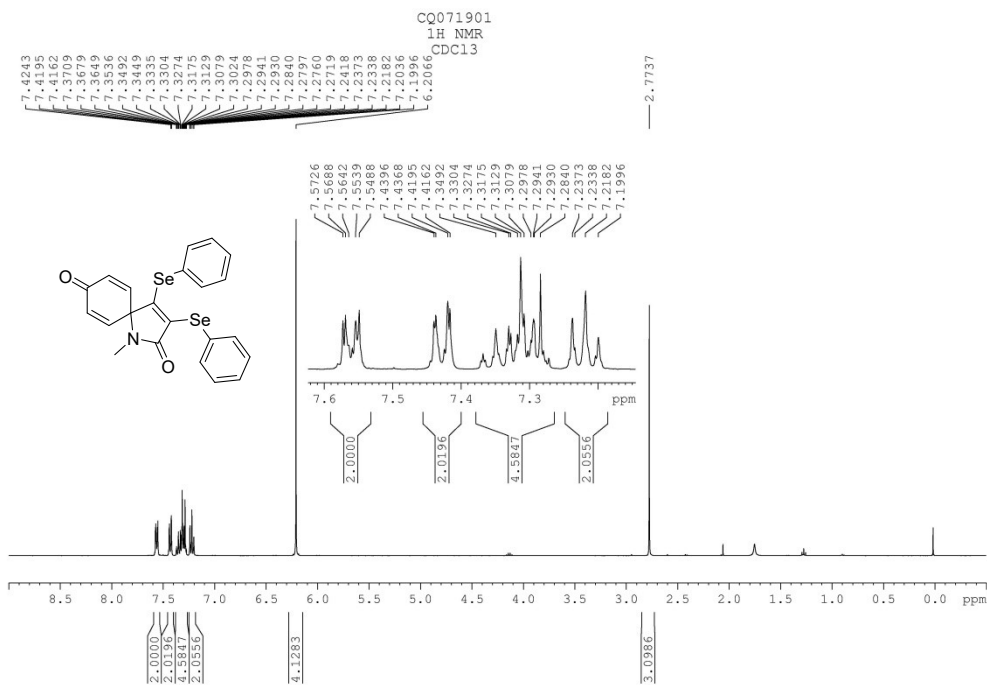

Fig. 45 <sup>1</sup>H NMR spectrum of compound 5a

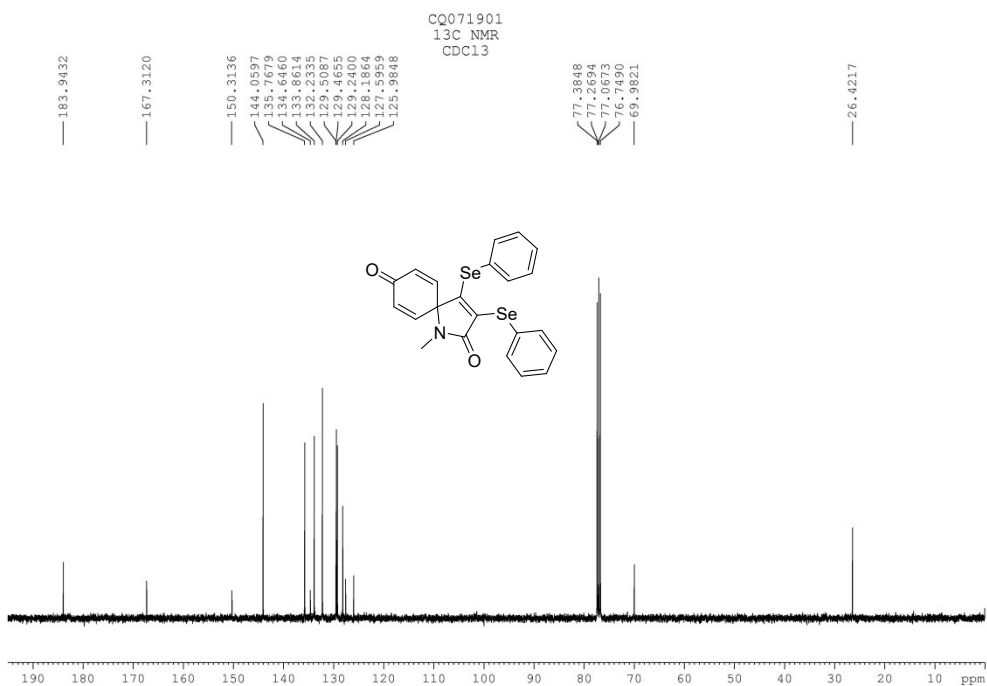

**Fig. 46**  $^{13}\text{C}$  NMR spectrum of compound 5a

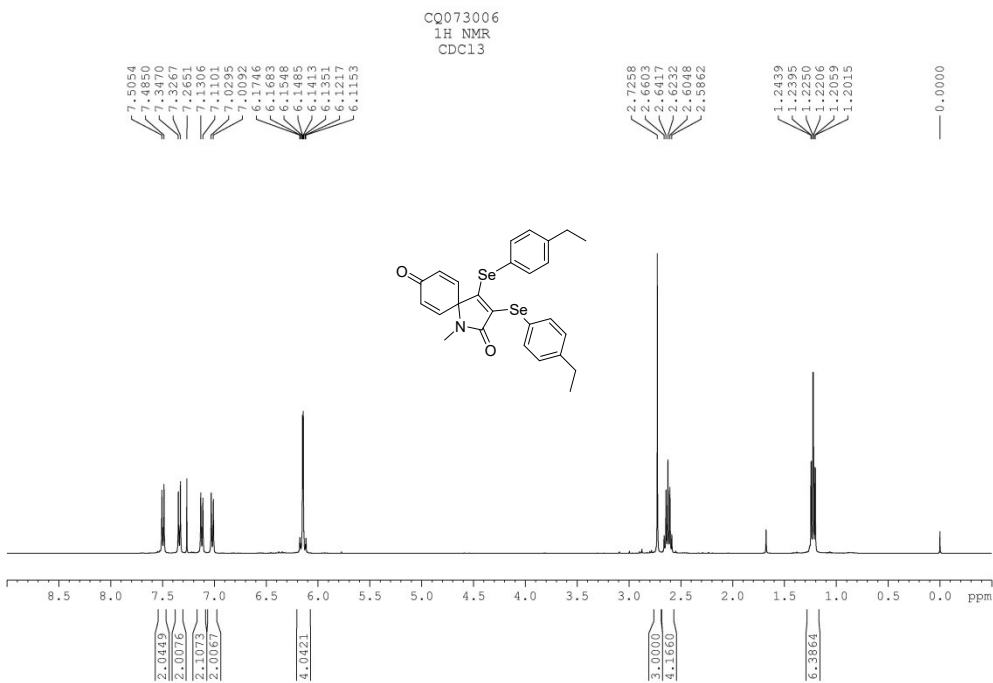

**Fig. 47**  $^1\text{H}$  NMR spectrum of compound 5b

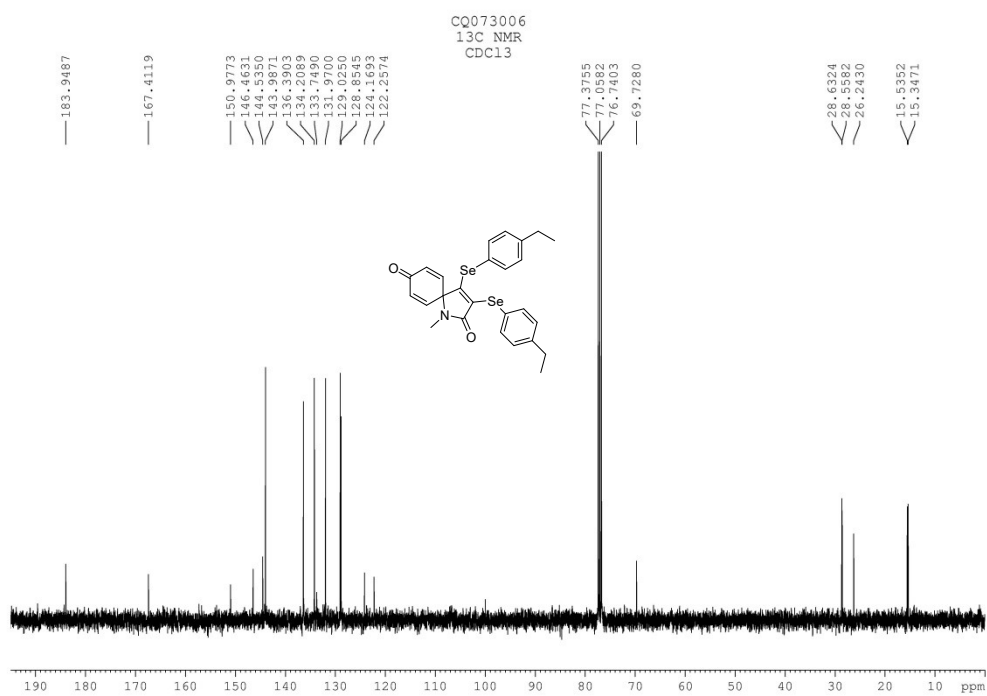

Fig. 48  $^{13}\text{C}$  NMR spectrum of compound 5b

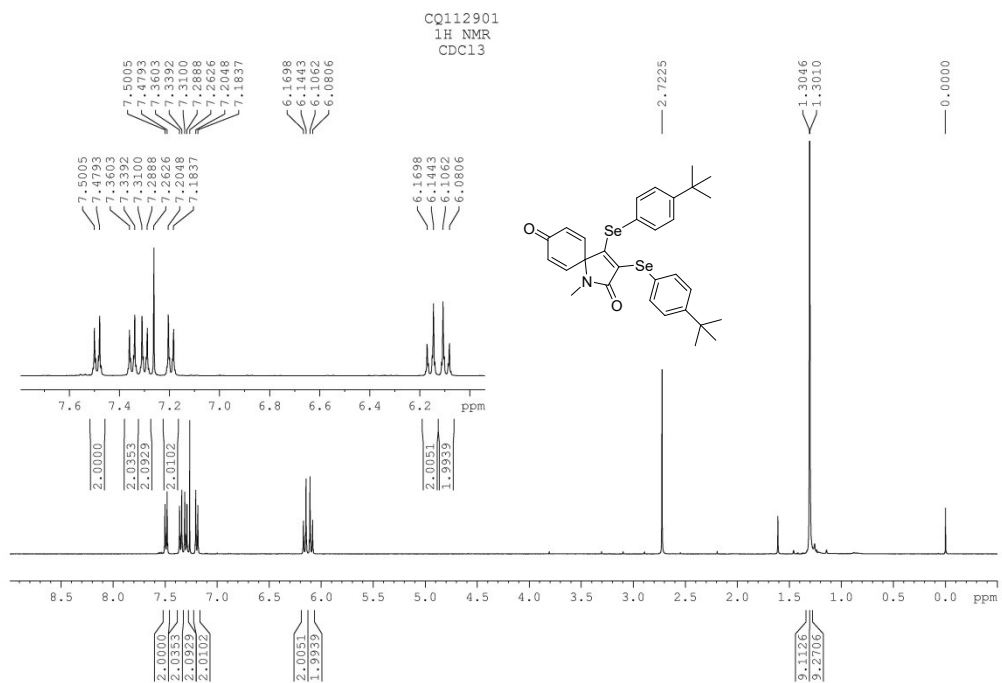

Fig. 49  $^1\text{H}$  NMR spectrum of compound 5c

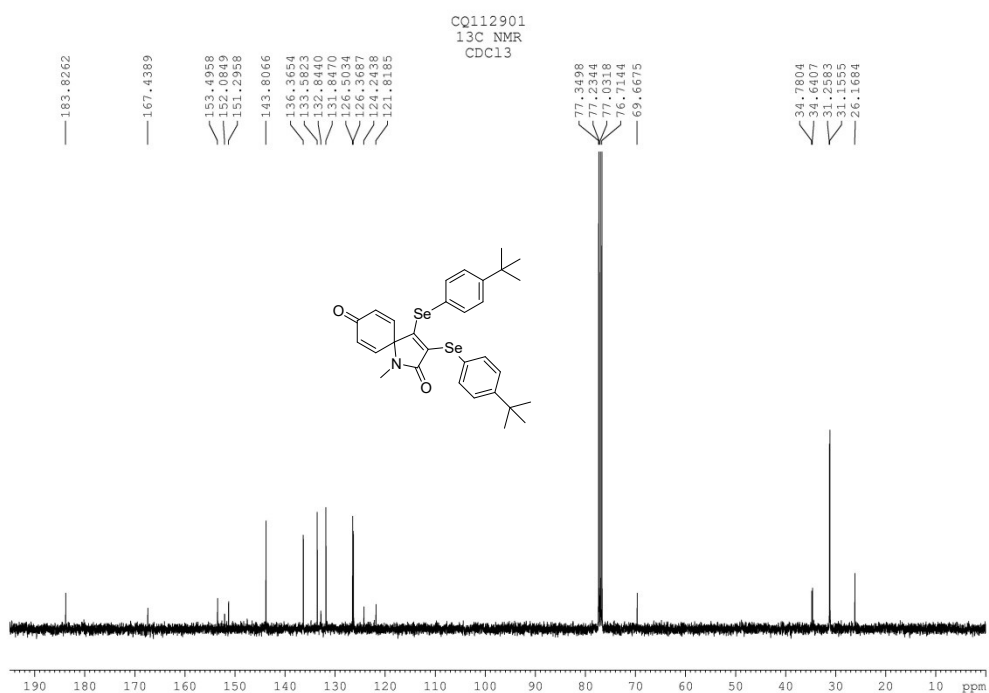

Fig. 50 <sup>13</sup>C NMR spectrum of compound 5c

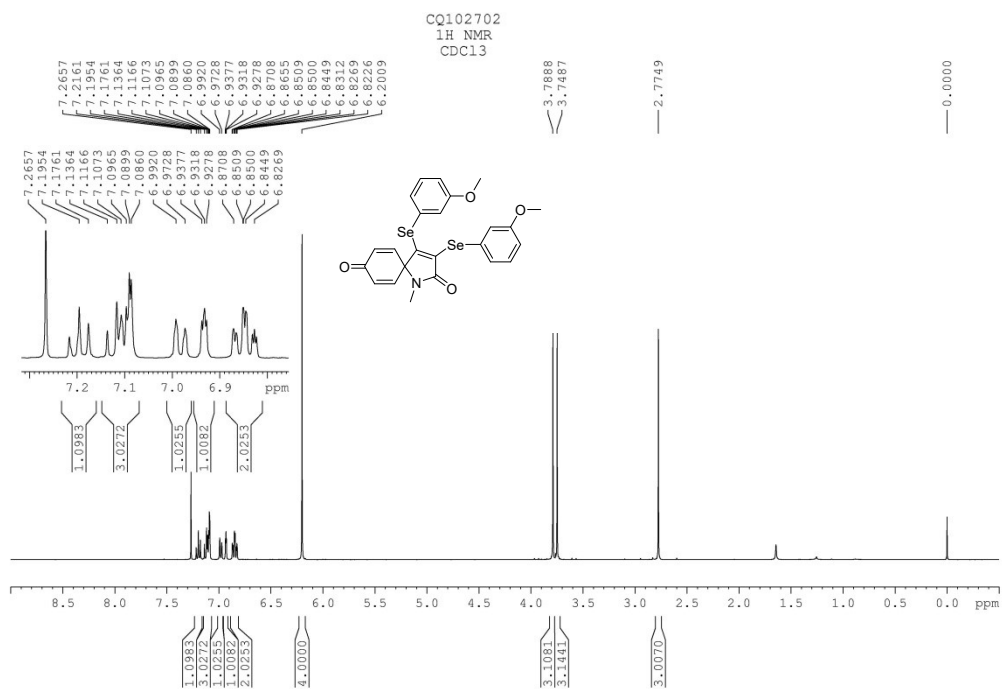

Fig. 51 <sup>1</sup>H NMR spectrum of compound 5d

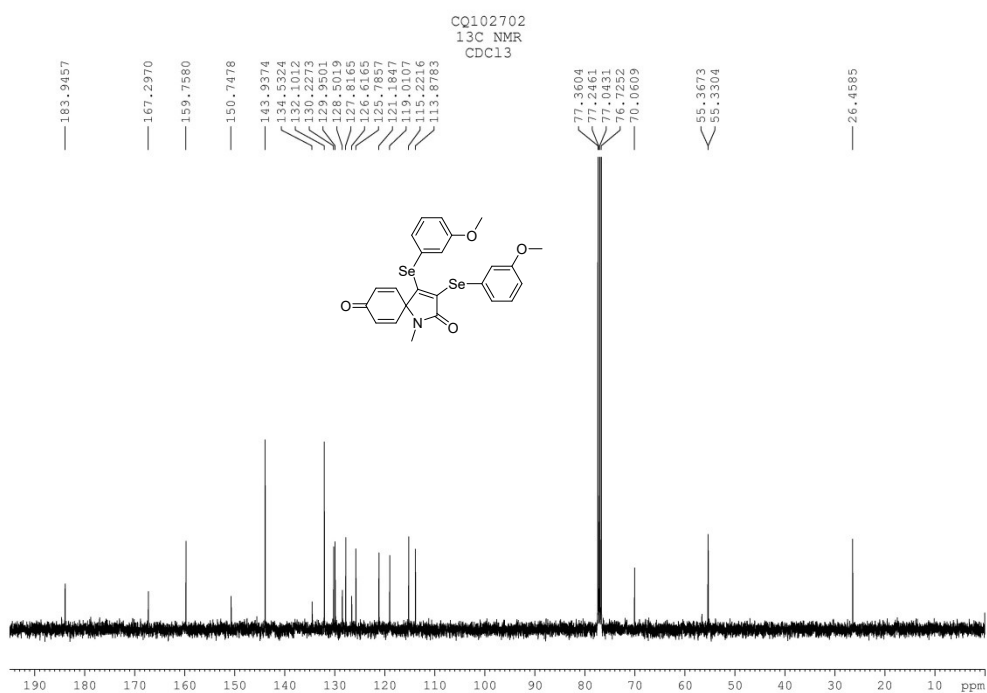

Fig. 52 <sup>13</sup>C NMR spectrum of compound 5d

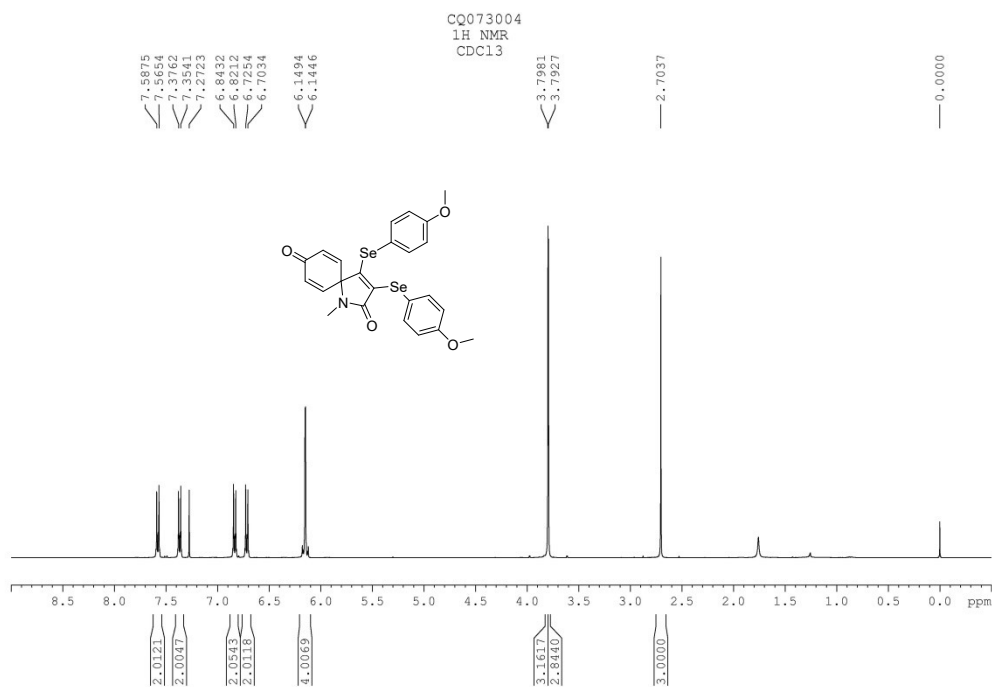

Fig. 53 <sup>1</sup>H NMR spectrum of compound 5e

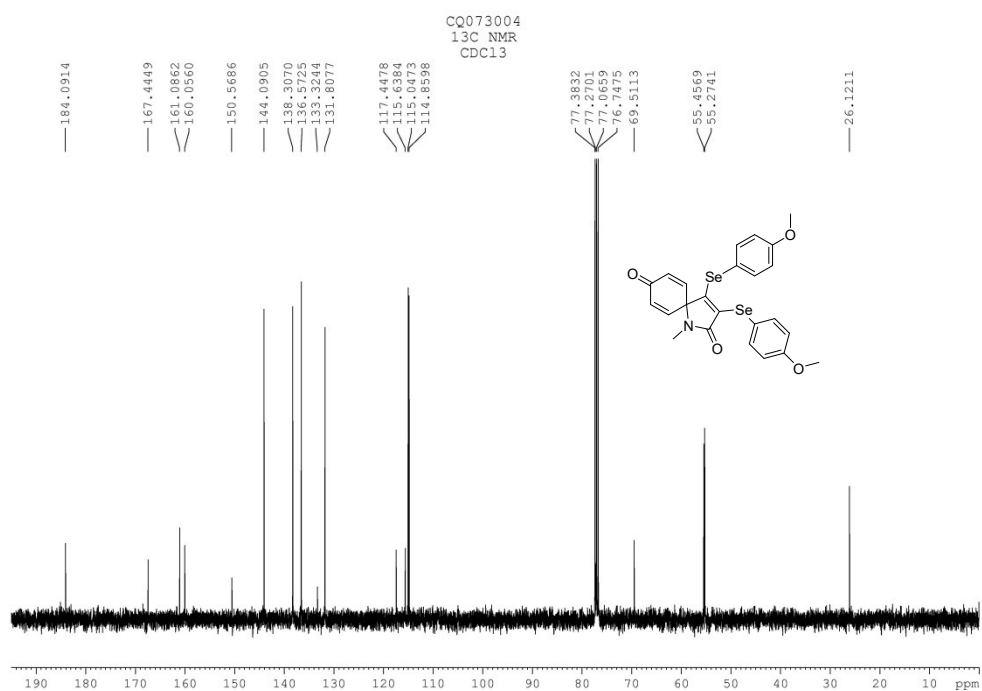

Fig. 54 <sup>13</sup>C NMR spectrum of compound 5e

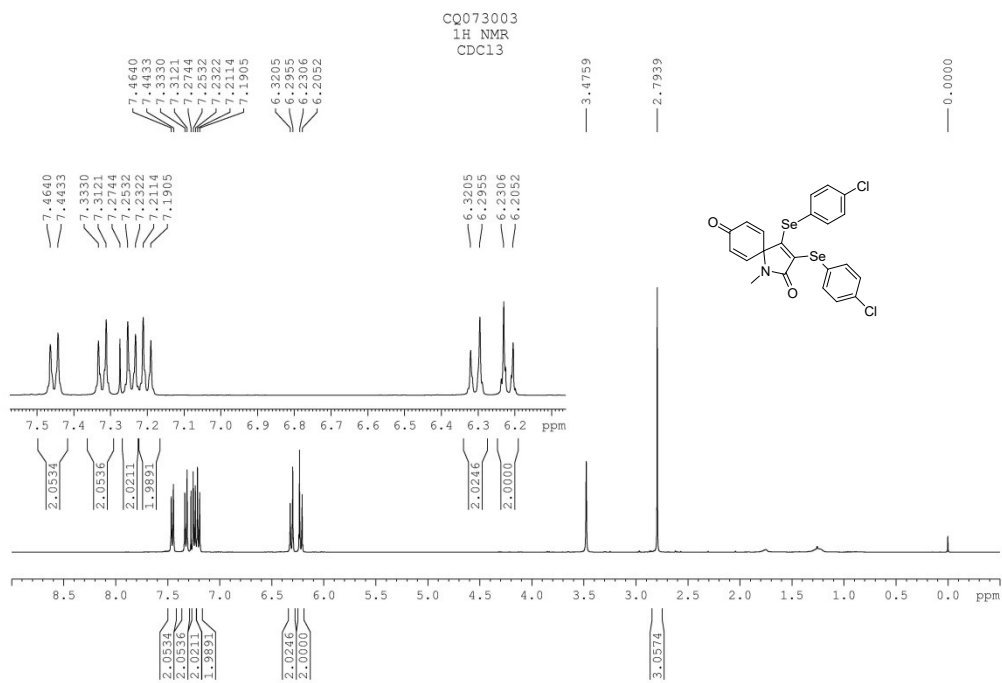

Fig. 55 <sup>1</sup>H NMR spectrum of compound 5f

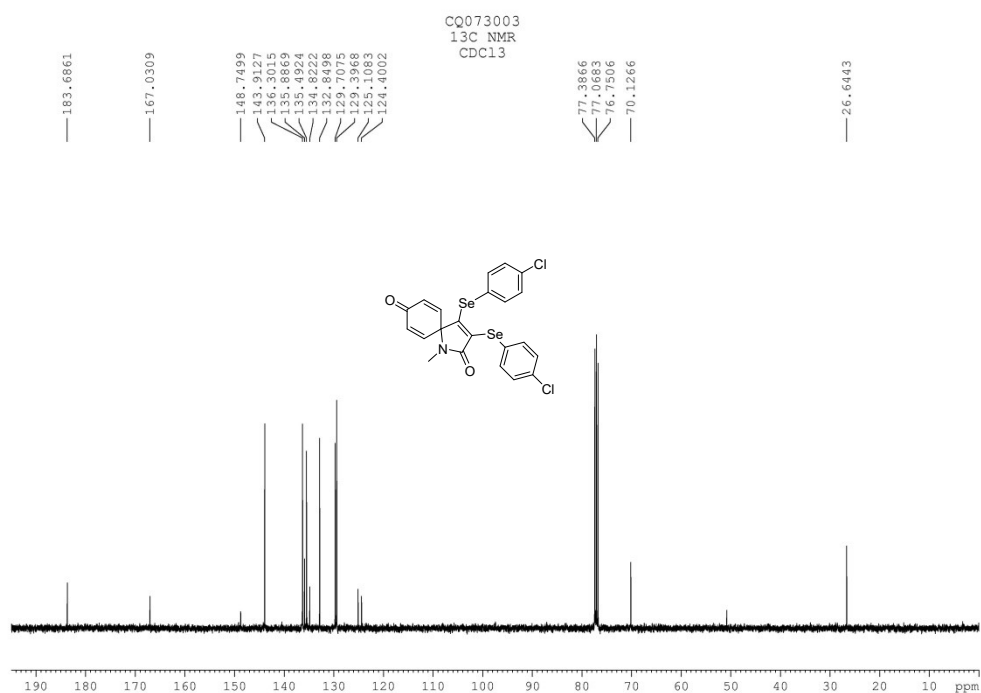

Fig. 56 <sup>13</sup>C NMR spectrum of compound 5f

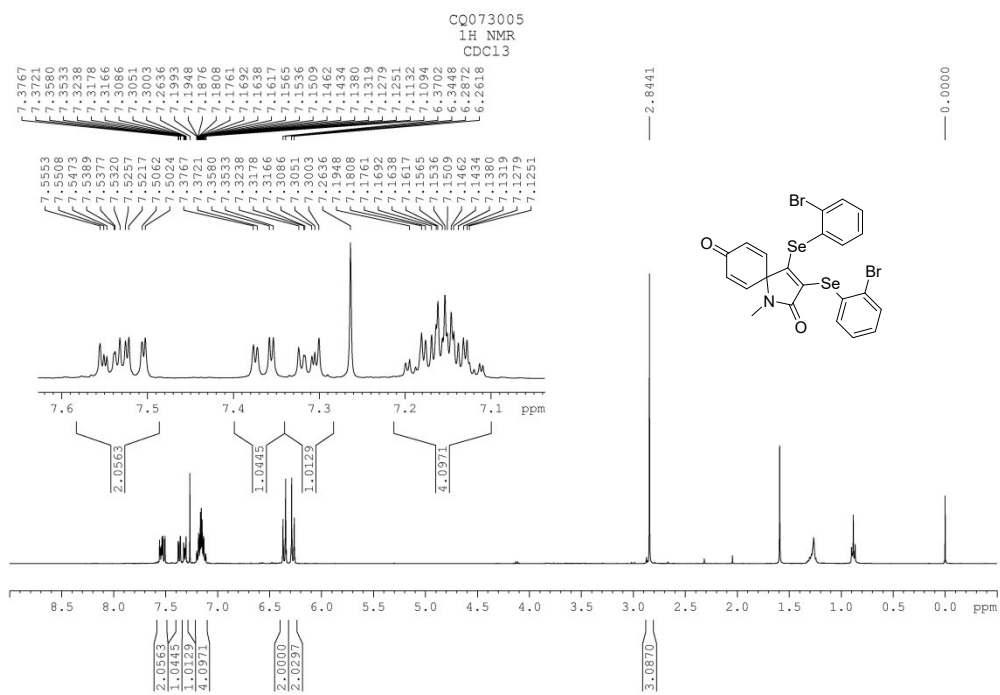

Fig. 57 <sup>1</sup>H NMR spectrum of compound 5g

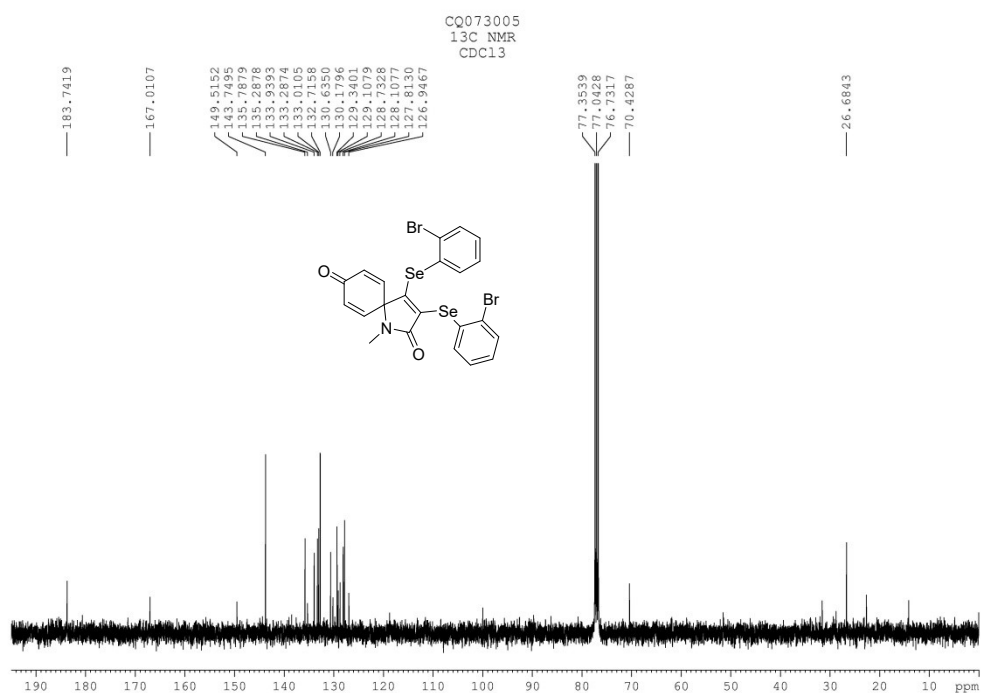

Fig. 58 <sup>13</sup>C NMR spectrum of compound 5g

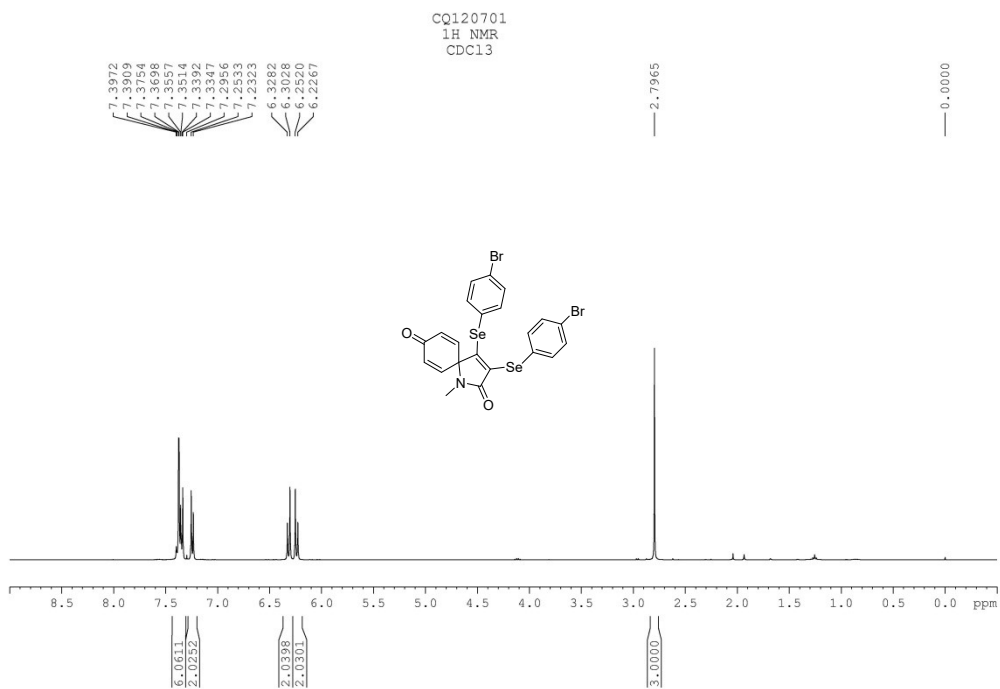

Fig. 59 <sup>1</sup>H NMR spectrum of compound 5h



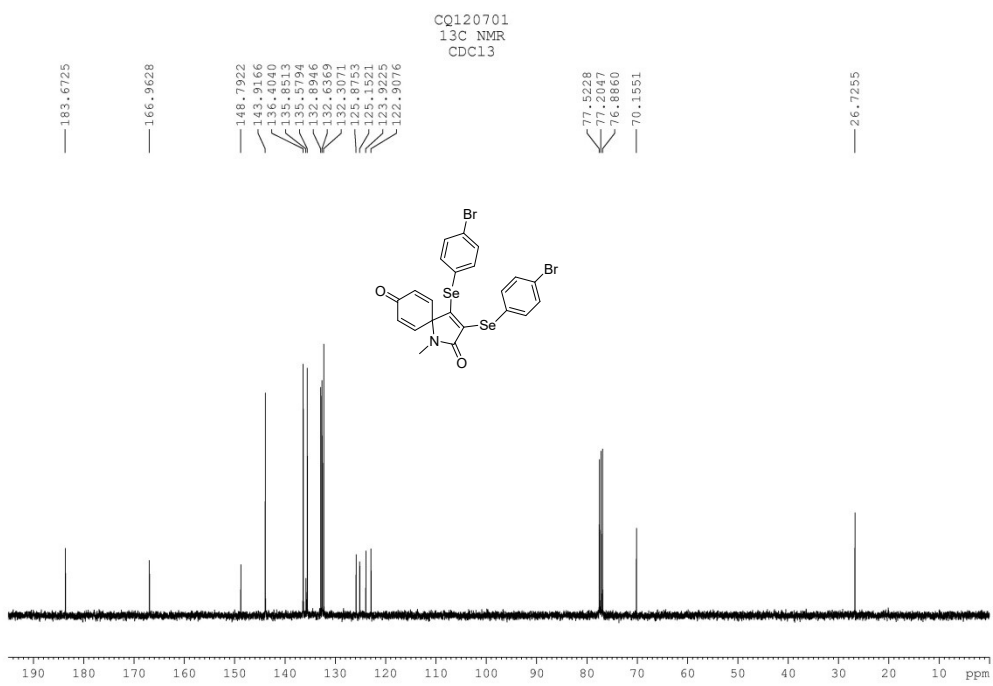

Fig. 60 <sup>13</sup>C NMR spectrum of compound 5h

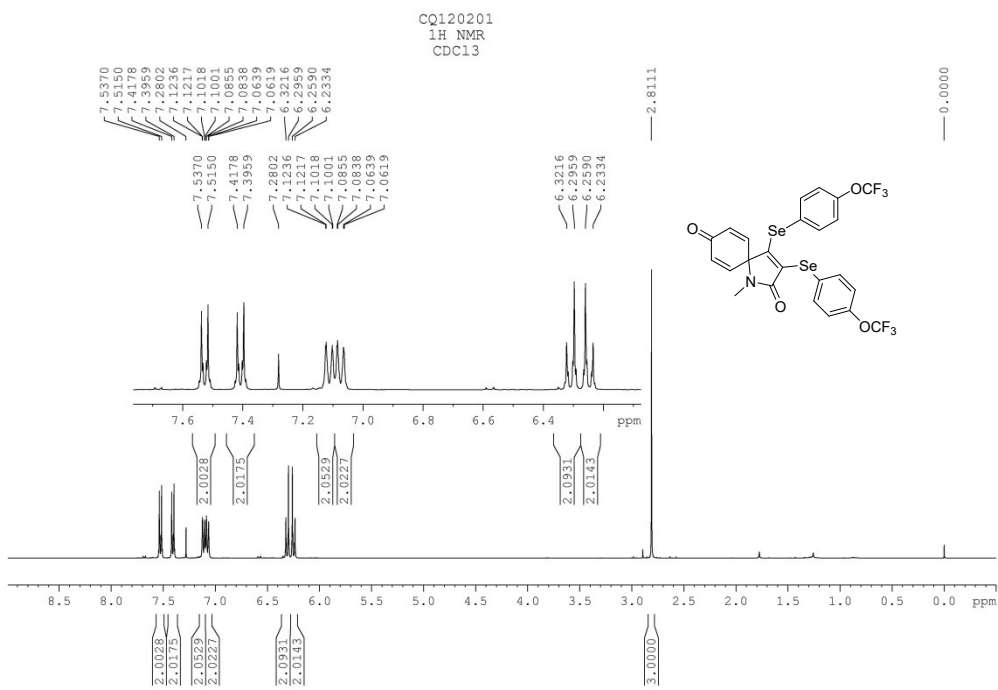

Fig. 61 <sup>1</sup>H NMR spectrum of compound 5i

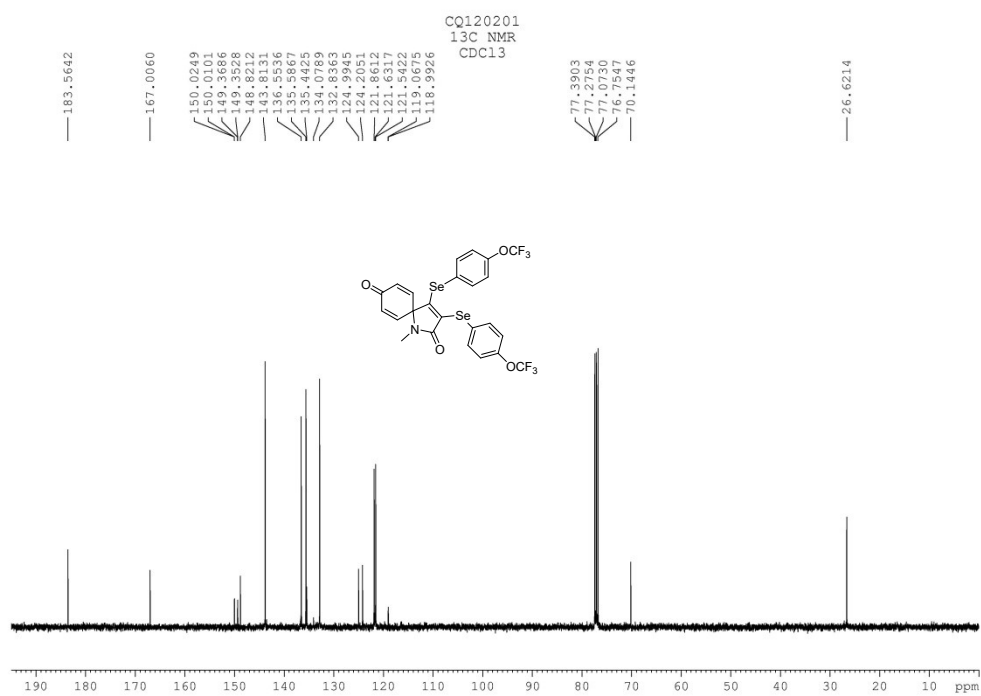

**Fig. 62**  $^{13}\text{C}$  NMR spectrum of compound **5i**

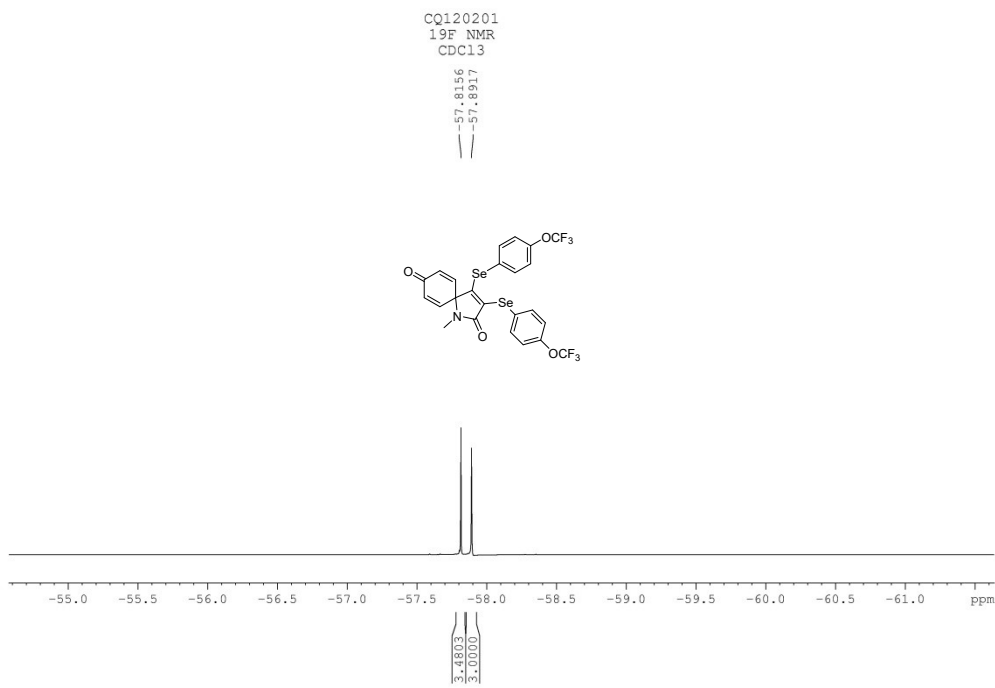

**Fig. 63**  $^{19}\text{F}$  NMR spectrum of compound **5i**

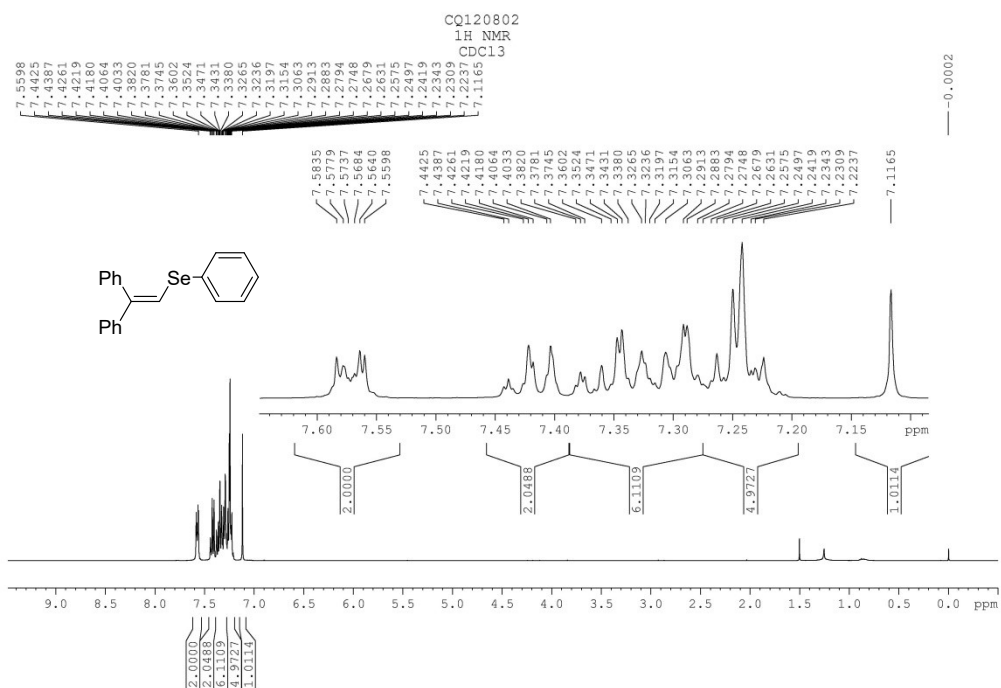

Fig. 64 <sup>1</sup>H NMR spectrum of compound 6

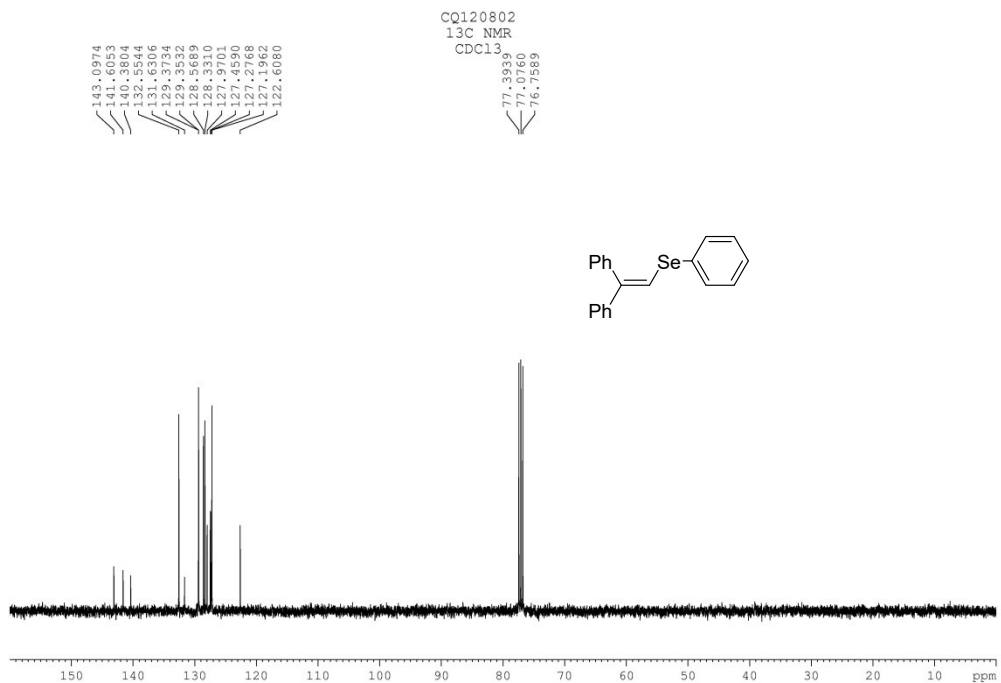

Fig. 65 <sup>13</sup>C NMR spectrum of compound 6
